# Supplementary material for: Volatile Chemical Variation of Essential Oils and Their Correlation with Insects, Phenology, Ontogeny and Microclimate: Piper mollicomum Kunth, a Case of Study
Source: MDPI journal article supplement (doi:10.3390/plants11243535), 2022-12-15
Supplement: s1 [file s1]

**Table S1.** Main chemical constituents of the essential oils from stages 1, 2 and 3 of the reproductive organ of *Piper mollicomum* Kunth from September 2020 to January 2021.

| Compounds <sup>a</sup>    | No. CAS    | RIC<br>alc | RI <sub>Lit</sub> | Relative Percentage % |      |       |       |       |         |       |       |       |       |         |       |       |       |       |
|---------------------------|------------|------------|-------------------|-----------------------|------|-------|-------|-------|---------|-------|-------|-------|-------|---------|-------|-------|-------|-------|
|                           |            |            |                   | Stage 1               |      |       |       |       | Stage 2 |       |       |       |       | Stage 3 |       |       |       |       |
|                           |            |            |                   | Sep                   | Oct  | Nov   | Dec   | Jan   | Sep     | Oct   | Nov   | Dec   | Jan   | Sep     | Oct   | Nov   | Dec   | Jan   |
| $\alpha$ -pinene*         | 7785-26-4  | 938        | 939               | 18.22                 | -    | 10.55 | 8.58  | 12.96 | 18.22   | -     | 9.35  | 7.04  | 13.59 | -       | 4.29  | 2.77  | 3.50  | 2.25  |
| camphene*                 | 79-92-5    | 947        | 954               | 25.41                 | -    | -     | -     | -     | -       | -     | -     | -     | -     | -       | 7.17  | -     | -     | -     |
| myrcene*                  | 123-35-3   | 963        | 974               | -                     | -    | 1.67  | 1.15  | 3.27  | -       | -     | 1.25  | 1.65  | 2.66  | -       | 1.13  | 1.27  | 0.92  | 1.55  |
| $\beta$ -pinene*          | 127-91-3   | 981        | 980               | -                     | -    | 17.13 | 6.39  | 15.84 | -       | -     | 8.15  | 6.18  | 18.19 | -       | 3.16  | 6.80  | 8.13  | 2.42  |
|                           | 5989-27-5  |            |                   |                       | 17.8 |       |       |       |         |       |       |       |       |         |       |       |       |       |
| limonene*                 |            | 1028       | 1029              | 8.39                  | 5    | -     | -     | -     | 9.17    | 20.07 | -     | -     | -     | 14.58   | 7.44  | -     | -     | -     |
| 1,8-cineole**             | 470-82-6   | 1032       | 1031              | 8.22                  | -    | 26.08 | 32.62 | 13.51 | -       | -     | 44.92 | 33.02 | 16.50 | -       | 0.16  | 51.28 | 22.93 | 33.75 |
| Z- $\beta$ -ocimene*      | 3338-55-4  | 1043       | 1037              | 3.29                  | -    | -     | -     | 3.18  | -       | -     | -     | 1.71  | 0.08  | 0.73    | 0.74  | -     | 4.35  | 0.10  |
| E- $\beta$ -ocimene*      | 3779-61-1  | 1049       | 1050              | -                     | -    | -     | -     | -     | -       | -     | -     | -     | -     | 2.24    | 2.10  | -     | -     | -     |
| camphor**                 | 464-49-3   | 1136       | 1141              | -                     | 2.01 | -     | -     | -     | -       | -     | -     | -     | -     | -       | 11.45 | -     | -     | -     |
| $\alpha$ -terpineole**    | 98-55-5    | 1187       | 1186              | -                     | 1.49 | 3.46  | 3.96  | 1.21  | -       | -     | 3.39  | 4.84  | 2.24  | -       | 0.86  | 5.61  | 1.66  | 3.32  |
| $\delta$ -terpineole**    | 7299-42-5  | 1188       | 1186              | -                     | -    | -     | 1.75  | 0.17  | -       | -     | -     | -     | 1.92  | -       | -     | -     | -     | 1.53  |
|                           | 78-70-6    |            |                   |                       | 44.2 |       |       |       |         |       |       |       |       |         |       |       |       |       |
| linalool**                |            | 1193       | 1198              | 29.24                 | 9    | -     | 6.11  | 2.43  | 29.24   | 46.21 | 4.15  | -     | 10.34 | 62.02   | 30.27 | 2.48  | 8.46  | 21.60 |
| $\beta$ -elemene***       | 33880-83-0 | 1377       | 1389              | -                     | -    | -     | 1.20  | 0.06  | -       | -     | -     | 0.35  | -     | -       | -     | -     | -     | 0.08  |
| E-caryophyllene***        | 87-44-5    | 1421       | 1419              | 5.36                  | 2.68 | -     | 1.44  | 0.19  | 4.42    | 2.76  | -     | 2.49  | -     | 2.12    | 3.47  | 2.77  | 0.44  | 0.13  |
| $\alpha$ -humulene***     | 6753-98-6  | 1447       | 1456              | -                     | -    | -     | -     | 0.16  | -       | 2.42  | -     | 0.95  | 0.03  | -       | 2.49  | -     | 2.50  | 1.34  |
| $\beta$ -selinene***      | 17066-67-0 | 1491       | 1490              | -                     | -    | -     | 0.24  | -     | -       | -     | -     | 0.75  | -     | 2.39    | 0.42  | -     | -     | 0.14  |
| E-nerolidol****           | 40716-66-3 | 1567       | 1563              | 2.28                  | 2.90 | 0.20  | 0.77  | 0.14  | 2.28    | -     | -     | 1.46  | 0.12  | 5.91    | 2.92  | -     | 2.66  | 0.03  |
| aromadendrene***          | 66105-35-9 | 1633       | 1639              | -                     | -    | -     | -     | -     | -       | -     | -     | -     | -     | -       | 0.86  | -     | -     | -     |
| caryophyllene acetate**** | 32214-91-8 | 1703       | 1701              | -                     | -    | 2.07  | 0.43  | -     | -       | -     | -     | 0.26  | 0.04  | -       | -     | -     | 0.37  | 0.50  |





|          |   |      |    |    |    |     |
|----------|---|------|----|----|----|-----|
| Day 18   | 0 | 0    | 1  | 0  | 0  | 0   |
| Day 28   | 0 | 1142 | 22 | 20 | 41 | 77  |
| December |   |      |    |    |    |     |
| Day 07   | 0 | 0    | 2  | 0  | 0  | 0   |
| Day 18   | 0 | 273  | 59 | 12 | 52 | 28  |
| Day 25   | 0 | 0    | 0  | 0  | 0  | 0   |
| January  |   |      |    |    |    |     |
| Day 02   | 0 | 0    | 1  | 2  | 7  | 0   |
| Day 08   | 0 | 2    | 1  | 4  | 1  | 2   |
| Day 22   | 0 | 274  | 9  | 0  | 1  | 102 |

**Table S4.** Spearman correlation analysis between insect visitors *vs.* identified compounds in the essential oil from inflorescences of *Piper mollicomum* Kunth *vs.* microclimate from September 2020 to January 2021.

| Variables     |                     | Spearman Correlation ( $r^2$ )                |                                                                             |                                               |                                                    |                                                    |                                                  |
|---------------|---------------------|-----------------------------------------------|-----------------------------------------------------------------------------|-----------------------------------------------|----------------------------------------------------|----------------------------------------------------|--------------------------------------------------|
|               |                     | Insect 1<br>(Diptera -<br>Syrphidae sp.<br>1) | Insect 2<br>(Hymenoptera -<br>Tetragonisca<br>angustula<br>Latreille, 1811) | Insect 3<br>(Diptera -<br>Syrphidae sp.<br>2) | Insect 4<br>(Hymenoptera<br>- Halictidae<br>sp. 1) | Insect 5<br>(Hymenoptera<br>- Halictidae<br>sp. 2) | Insect 6<br>(Hymenoptera<br>- Colletidae<br>sp.) |
| Main compound | Camphene            | <b>1.000**</b>                                | 0.612                                                                       | 0.608                                         | -0.441                                             | <b>0.918*</b>                                      | <b>0.992**</b>                                   |
|               | Limonene            | 0.260                                         | -0.146                                                                      | -0.226                                        | 0.395                                              | 0.011                                              | 0.266                                            |
|               | 1,8-cineole         | -0.543                                        | 0.198                                                                       | -0.247                                        | 0.092                                              | -0.348                                             | -0.513                                           |
|               | Z- $\beta$ -ocimene | -0.138                                        | -0.395                                                                      | 0.636                                         | -0.107                                             | 0.128                                              | -0.256                                           |
|               | E-caryophyllene     | 0.645                                         | 0.806                                                                       | 0.186                                         | 0.356                                              | 0.606                                              | 0.648                                            |
|               | eupatoriochromene   | 0.419                                         | 0.297                                                                       | <b>0.961**</b>                                | -0.176                                             | 0.715                                              | 0.304                                            |
|               | $\alpha$ -pinene    | 0.593                                         | 0.581                                                                       | 0.846                                         | -0.595                                             | <b>0.804*</b>                                      | 0.546                                            |
|               | Linalool            | 0.127                                         | -0.379                                                                      | -0.387                                        | 0.238                                              | -0.187                                             | 0.155                                            |

|                 |                                      |                |                |                |               |               |                |
|-----------------|--------------------------------------|----------------|----------------|----------------|---------------|---------------|----------------|
|                 | <i>E</i> -nerolidol                  | 0.141          | −0.357         | 0.027          | 0.376         | 0.017         | 0.094          |
|                 | <i>β</i> -selinene                   | −0.095         | −0.392         | −0.480         | 0.532         | −0.340        | −0.080         |
|                 | <i>E</i> - <i>β</i> -ocimene         | 0.579          | 0.097          | 0.028          | 0.174         | 0.339         | 0.581          |
|                 | aromadendrene                        | <b>1.000**</b> | 0.612          | 0.608          | −0.441        | <b>0.918*</b> | <b>0.992**</b> |
|                 | Camphor                              | <b>1.000**</b> | 0.612          | 0.608          | −0.441        | <b>0.918*</b> | <b>0.992**</b> |
|                 | <i>α</i> -terpineole                 | −0.360         | 0.413          | −0.233         | 0.091         | −0.200        | −0.317         |
|                 | <i>α</i> -humulene                   | 0.550          | 0.021          | 0.850          | −0.787        | 0.655         | 0.486          |
|                 | <i>β</i> -pinene                     | −0.159         | 0.275          | 0.566          | −0.016        | 0.234         | −0.239         |
|                 | Myrcene                              | 0.148          | 0.398          | 0.201          | −0.648        | 0.238         | 0.188          |
|                 | caryophyllene acetate                | −0.402         | −0.614         | −0.010         | −0.633        | −0.364        | −0.396         |
|                 | <i>δ</i> -terpineole                 | −0.250         | −0.381         | −0.454         | −0.605        | −0.435        | −0.159         |
|                 | <i>β</i> -elemene                    | −0.250         | −0.381         | −0.454         | −0.605        | −0.435        | −0.159         |
|                 | benzyl benzoate                      | −0.250         | −0.384         | 0.587          | −0.114        | 0.050         | −0.362         |
|                 | <i>γ</i> -terpinene                  | −0.250         | −0.384         | 0.587          | −0.114        | 0.050         | −0.362         |
|                 | tolualdehyde                         | −0.250         | −0.384         | 0.587          | −0.114        | 0.050         | −0.362         |
|                 | germacren D                          | −0.250         | −0.381         | −0.454         | −0.605        | −0.435        | −0.159         |
|                 | <i>δ</i> -cadinene                   | −0.262         | −0.402         | 0.575          | −0.139        | 0.033         | −0.371         |
| Abiotic factors | Wind speed (m/s)                     | −0.174         | 0.284          | 0.413          | 0.491         | 0.291         | 0.176          |
|                 | Relative humidity (%)                | −0.311         | <b>−0.667*</b> | −0.394         | −0.319        | −0.512        | <b>−0.623*</b> |
|                 | Local temperature (°C)               | 0.034          | <b>0.749*</b>  | <b>0.633*</b>  | 0.303         | <b>0.606*</b> | <b>0.642*</b>  |
|                 | Inflorescence temperature (°C)       | 0.104          | <b>0.688*</b>  | <b>0.559*</b>  | 0.340         | <b>0.606*</b> | <b>0.616*</b>  |
|                 | Leaf temperature (°C)                | 0.173          | <b>0.763*</b>  | <b>0.626*</b>  | 0.437         | <b>0.717*</b> | <b>0.692*</b>  |
|                 | Rain (mm)                            | −0.144         | <b>−0.649*</b> | <b>−0.657*</b> | −0.245        | −0.279        | <b>−0.649*</b> |
|                 | Radiation (kJ/m <sup>2</sup> )       | 0.241          | <b>0.869*</b>  | 0.530          | 0.327         | 0.443         | 0.749          |
|                 | Light intensity (kJ/m <sup>2</sup> ) | 0.104          | 0.497          | 0.296          | <b>0.538*</b> | <b>0.560*</b> | 0.281          |

\* $p < 0.05$ ; \*\* $p < 0.01$ .

**Table S5.** Spearman's correlation analysis between microclimate *vs.* identified compounds in the essential oil from inflorescences of *Piper mollicomum* Kunth from September 2020 to January 2021.

| Compounds                   | Spearman Correlation ( $r^2$ ) |                             |                   |                |                |                |                                         |
|-----------------------------|--------------------------------|-----------------------------|-------------------|----------------|----------------|----------------|-----------------------------------------|
|                             | Wind Speed<br>(m/s)            | Relative<br>Humidity<br>(%) | Temperature (°C)  |                |                | Rain<br>(mm)   | Light Intensity<br>(kJ/m <sup>2</sup> ) |
|                             |                                |                             | Local<br>Averages | Inflor.        | Leaf           |                |                                         |
| <b>camphene</b>             | <b>1.000**</b>                 | <b>0.067</b>                | <b>0.784</b>      | −0.045         | −0.122         | −0.256         | −0.408                                  |
| limonene                    | 0.260                          | −0.299                      | −0.187            | 0.540          | 0.484          | 0.867          | 0.375                                   |
| 1,8-cineole                 | −0.543                         | −0.093                      | 0.074             | −0.364         | −0.291         | −0.548         | −0.406                                  |
| <i>Z</i> - $\beta$ -ocimene | −0.138                         | <b>0.949*</b>               | −0.430            | −0.597         | −0.597         | −0.124         | 0.711                                   |
| <i>E</i> -caryophyllene     | 0.645                          | −0.208                      | 0.657             | −0.113         | −0.173         | 0.121          | −0.330                                  |
| eupatoriochromene           | 0.419                          | <b>0.911*</b>               | 0.246             | −0.833         | −0.869         | −0.435         | 0.241                                   |
| $\alpha$ -pinene            | 0.593                          | 0.538                       | 0.699             | −0.661         | −0.684         | <b>−0.880*</b> | −0.428                                  |
| linalool                    | 0.127                          | −0.409                      | −0.331            | 0.749          | 0.708          | <b>0.882*</b>  | 0.372                                   |
| <i>E</i> -nerolidol         | 0.141                          | 0.126                       | −0.426            | 0.271          | 0.220          | 0.828          | 0.721                                   |
| $\beta$ -selinene           | −0.095                         | −0.367                      | −0.478            | 0.618          | 0.590          | <b>0.985**</b> | 0.512                                   |
| <i>E</i> - $\beta$ -ocimene | 0.579                          | −0.229                      | 0.124             | 0.439          | 0.365          | 0.640          | 0.169                                   |
| aromadendrene               | <b>1.000**</b>                 | 0.067                       | 0.784             | −0.045         | −0.122         | −0.256         | −0.408                                  |
| camphor                     | <b>1.000**</b>                 | 0.067                       | 0.784             | −0.045         | −0.122         | −0.256         | −0.408                                  |
| $\alpha$ -terpineole        | −0.360                         | −0.215                      | 0.293             | −0.334         | −0.274         | −0.580         | −0.589                                  |
| $\alpha$ -humulene          | 0.550                          | 0.672                       | 0.277             | −0.354         | −0.388         | −0.560         | 0.012                                   |
| $\beta$ -pinene             | −0.159                         | 0.717                       | 0.123             | <b>−0.945*</b> | <b>−0.916*</b> | −0.682         | 0.021                                   |
| myrcene                     | 0.148                          | −0.033                      | 0.581             | −0.245         | −0.216         | <b>−0.927*</b> | −0.775                                  |
| caryophyllene acetate       | −0.402                         | 0.218                       | −0.370            | 0.065          | 0.116          | −0.395         | 0.069                                   |
| $\delta$ -terpineole        | −0.250                         | −0.468                      | −0.078            | 0.564          | 0.609          | −0.256         | −0.408                                  |
| $\beta$ -elemene            | −0.250                         | −0.468                      | −0.078            | 0.564          | 0.609          | −0.256         | −0.408                                  |
| benzyl benzoate             | −0.250                         | <b>0.935*</b>               | −0.431            | −0.654         | −0.639         | −0.233         | 0.640                                   |
| $\gamma$ -terpinene         | −0.250                         | <b>0.935*</b>               | −0.431            | −0.654         | −0.639         | −0.233         | 0.640                                   |
| tolualdehyde                | −0.250                         | <b>0.935*</b>               | −0.431            | −0.654         | −0.639         | −0.233         | 0.640                                   |
| germacren D                 | −0.250                         | −0.468                      | −0.078            | 0.564          | 0.609          | −0.256         | −0.408                                  |
| $\delta$ -cadinene          | −0.262                         | <b>0.926*</b>               | −0.438            | −0.638         | −0.621         | −0.245         | 0.630                                   |

\* $p < 0.05$ ; \*\*  $p < 0.01$ ; Inflor. – Inflorescence.

**Table S6.** Spearman's correlation analysis between insect visitors *vs.* pattern of phenological events of *Piper mollicomum* Kunth from September 2020 to January 2021.

| Variables analyzed |               | Spearman Correlation ( $r^2$ )                       |                                                                                           |                                                      |                                                               |                                                               |                                                          |
|--------------------|---------------|------------------------------------------------------|-------------------------------------------------------------------------------------------|------------------------------------------------------|---------------------------------------------------------------|---------------------------------------------------------------|----------------------------------------------------------|
|                    |               | Insect 1<br>(Diptera -<br><i>Syrphidae</i> sp.<br>1) | Insect 2<br>(Hymenoptera -<br><i>Tetragonisca</i><br><i>angustula</i><br>Latreille. 1811) | Insect 3<br>(Diptera -<br><i>Syrphidae</i><br>sp. 2) | Insect 4<br>(Hymenopter<br>a -<br><i>Halictidae</i><br>sp. 1) | Insect 5<br>(Hymenopter<br>a -<br><i>Halictidae</i><br>sp. 2) | Insect 6<br>(Hymenopter<br>a - <i>Colletidae</i><br>sp.) |
| Phenophases        | Leaf Budding  | 0.000                                                | −0.161                                                                                    | −0.025                                               | −0.271                                                        | −0.341                                                        | 0.007                                                    |
|                    | Leaf Fall     | −0.144                                               | −0.009                                                                                    | 0.176                                                | −0.088                                                        | 0.059                                                         | 0.213                                                    |
|                    | Mature        |                                                      |                                                                                           |                                                      |                                                               |                                                               |                                                          |
|                    | Inflorescence | 0.172                                                | 0.236                                                                                     | 0.284                                                | 0.101                                                         | 0.169                                                         | 0.142                                                    |
|                    | Immature      |                                                      |                                                                                           |                                                      |                                                               |                                                               |                                                          |
|                    | Inflorescence | 0.311                                                | 0.276                                                                                     | 0.278                                                | 0.019                                                         | 0.155                                                         | 0.332                                                    |
|                    | Number of     |                                                      |                                                                                           |                                                      |                                                               |                                                               |                                                          |
|                    | Inflorescence | 0.173                                                | 0.242                                                                                     | 0.317                                                | 0.087                                                         | 0.141                                                         | 0.168                                                    |
|                    | Immature      |                                                      |                                                                                           |                                                      |                                                               |                                                               |                                                          |
|                    | Infrutescence | −0.318                                               | −0.306                                                                                    | −0.399                                               | −0.002                                                        | −0.165                                                        | −0.447                                                   |
|                    | Mature        |                                                      |                                                                                           |                                                      |                                                               |                                                               |                                                          |
|                    | Infrutescence | −0.077                                               | 0.243                                                                                     | 0.173                                                | −0.257                                                        | −0.139                                                        | 0.243                                                    |

**Table S7.** Spearman's correlation analysis between abiotic factors *vs.* pattern of phenological events of *Piper mollicomum* Kunth from September 2020 to January 2021.

| Variables analyzed   | Spearman Correlation ( $r^2$ ) |              |            |               |                                         |
|----------------------|--------------------------------|--------------|------------|---------------|-----------------------------------------|
|                      | Temperature (°C)               | Humidity (%) | Wind (m/s) | Rain (mm)     | Light Intensity<br>(kJ/m <sup>2</sup> ) |
| Leaf Budding         | -0.600                         | 0.600        | 0.000      | <b>0.800*</b> | <b>-0.800*</b>                          |
| Leaf Fall            | <b>-0.783*</b>                 | 0.224        | 0.335      | 0.335         | -0.335                                  |
| Mature Inflorescence | 0.100                          | -0.100       | 0.500      | -0.300        | 0.300                                   |
| Immature             |                                |              |            |               |                                         |
| Inflorescence        | -0.400                         | 0.000        | 0.600      | -0.200        | 0.200                                   |

|                         |       |        |        |        |       |
|-------------------------|-------|--------|--------|--------|-------|
| Number of Inflorescence | 0.100 | −0.100 | 0.500  | −0.300 | 0.300 |
| Immature Infrutescence  | 0.600 | −0.100 | −0.600 | −0.200 | 0.200 |
| Mature Infrutescence    | 0.354 | −0.354 | −0.354 | −0.354 | 0.354 |

\*  $p < 0.05$ .

**Table S8.** Characterization of the collection sites of *Piper mollicomum* Kunth accessions from the Tijuca National Park (PM-TNP), city of Rio de Janeiro, RJ.

| Site    | Latitude (S)/ Longitude (W) | Elevation (m) | Voucher number |
|---------|-----------------------------|---------------|----------------|
| PM-TNP1 | 22°58'08.2" / 43°14'24.1"   | 127           | HRJ13444       |
| PM-TNP2 | 22°58'09.0" / 43°14'26.3"   | 71            | HRJ13445       |
| PM-TNP3 | 22°58'14.0" / 43°14'32.9"   | 92            | HRJ13448       |
| PM-TNP4 | 22°58'17.8" / 43°14'31.9"   | 68            | HRJ13449       |
| PM-TNP5 | 22°58'20.2" / 43°14'33.6"   | 74            | HRJ13447       |
| PM-TNP6 | 22°58'21.3" / 43°14'34.2"   | 87            | HRJ13446       |

**Table S9.** Constituents of essential oils from leaves and different stages of inflorescences of *Piper mollicomum* Kunth.

| <i>Piper mollicomum</i> - September/2020 |       |      |        |        |       |         |       |
|------------------------------------------|-------|------|--------|--------|-------|---------|-------|
| Compounds                                | tR    | IRKc | IRKlit | % in 1 | IM    | Average | SD    |
| Leaf                                     |       |      |        |        |       |         |       |
| 3E-Hexenol                               | 3.793 | 845  | 844    | 0.39   | ADAMS | 0.669   | 0.008 |
| α-pinene                                 | 5.395 | 932  | 932    | 2.13   | ADAMS | 2.385   | 0.007 |
| camphene                                 | 5.816 | 934  | 946    | 0.87   | ADAMS | 0.923   | 0.004 |
| β-pinene                                 | 6.578 | 941  | 974    | 5.43   | ADAMS | 6.304   | 0.024 |
| myrcene                                  | 6.844 | 943  | 988    | 0.47   | ADAMS | 0.476   | 0.009 |



|                            |        |      |      |       |            |        |       |
|----------------------------|--------|------|------|-------|------------|--------|-------|
| limonene                   | 8.142  | 1032 | 1024 | 2.26  | ADAMS      | 3.763  | 0.016 |
| 1,8-cineole                | 8.233  | 1032 | 1026 | 1.91  | ADAMS      | 0.868  | 0.004 |
| linalool                   | 10.924 | 1088 | 1008 | 37.16 | ADAMS      | 44.849 | 0.114 |
| $\alpha$ -fenchocamphorone | 10.988 | 1088 | 1104 | 0.62  | ADAMS      | 0.321  | 0.018 |
| camphor                    | 12.534 | 1142 | 1141 | 1.78  | NIST       | 1.574  | 0.003 |
| borneol                    | 13.527 | 1147 | 1165 | 0.11  | NIST/ADAMS | 0.085  | 0.002 |
| $\alpha$ -terpineol        | 14.519 | 1150 | 1186 | 0.43  | ADAMS      | 0.391  | 0.005 |
| isopulegyl acetate         | 18.083 | 1285 | 1283 | 0.41  | ADAMS      | 0.204  | 0.078 |
| bornyl acetate             | 18.21  | 1286 | 1284 | 0.22  | ADAMS      | 0.069  | 0.003 |
| undecanone                 | 18.653 | 1290 | 1293 | 0.76  | ADAMS      | 0.730  | 0.006 |
| undecanol                  | 19.104 | 1305 | 1301 | 0.30  | ADAMS      | 0.041  | 0.002 |
| $\delta$ -elemene          | 20.199 | 1346 | 1335 | 0.36  | ADAMS      | 0.084  | 0.001 |
| $\beta$ -elemene           | 22.637 | 1376 | 1389 | 3.13  | ADAMS      | 2.456  | 0.006 |
| $\alpha$ -gurjunene        | 23.291 | 1410 | 1409 | 0.10  | ADAMS      | 0.104  | 0.001 |
| E-caryophyllene            | 23.796 | 1415 | 1417 | 2.07  | ADAMS      | 2.331  | 0.004 |
| $\gamma$ -elemene          | 24.247 | 1418 | 1434 | 1.12  | ADAMS      | 1.651  | 0.004 |
| $\alpha$ -humulene         | 25.247 | 1455 | 1452 | 1.66  | ADAMS      | 1.332  | 0.003 |
| aromadendrene              | 25.417 | 1457 | 1439 | 0.22  | ADAMS      | 0.278  | 0.001 |
| $\alpha$ -amorphene        | 26.084 | 1462 | 1483 | 0.23  | ADAMS      | 0.213  | 0.001 |
| germacrene D               | 26.322 | 1463 | 1480 | 4.45  | ADAMS      | 2.344  | 0.010 |
| cis-4,10-epoxy-amorphane   | 26.585 | 1464 | 1481 | 0.76  | ADAMS      | 0.224  | 0.070 |
| $\alpha$ -cubebene         | 26.705 | 1491 | 1348 | 0.20  | ADAMS      | 0.210  | 0.002 |
| bicyclogermacrene          | 26.879 | 1492 | 1500 | 2.33  | ADAMS      | 1.531  | 0.696 |
| tridecanone                | 27.028 | 1471 | 1495 | 0.50  | ADAMS      | 0.315  | 0.011 |
| E,E- $\alpha$ -farnesene   | 27.348 | 1507 | 1505 | 0.39  | ADAMS      | 0.258  | 0.048 |
| $\gamma$ -cadinene         | 27.579 | 1511 | 1513 | 0.19  | ADAMS      | 0.166  | 0.015 |
| $\delta$ -cadinene         | 27.807 | 1511 | 1522 | 0.90  | ADAMS      | 1.000  | 0.109 |
| $\beta$ -panasinsene       | 28.476 | 1510 | 1381 | 0.16  | ADAMS      | 0.133  | 0.020 |
| cis-muurolo-3,5-diene      | 28.664 | 1512 | 1448 | 0.14  | ADAMS      | 0.274  | 0.027 |
| elemol acetate             | 28.983 | 1542 | 1559 | 0.36  | ADAMS      | 0.163  | 0.026 |
| germacrene B               | 29.292 | 1544 | 1561 | 0.50  | ADAMS      | 0.146  | 0.001 |
| E-nerolidol                | 29.579 | 1546 | 1556 | 2.75  | ADAMS      | 2.174  | 0.013 |

|                                        |        |      |      |              |       |               |       |
|----------------------------------------|--------|------|------|--------------|-------|---------------|-------|
| maaliol                                | 29.771 | 1548 | 1566 | 0.18         | ADAMS | 0.129         | 0.026 |
| caryophyllene oxide                    | 29.955 | 1591 | 1496 | 0.11         | ADAMS | 0.137         | 0.037 |
| guaiol                                 | 30.043 | 1592 | 1600 | 0.33         | ADAMS | 0.242         | 0.082 |
| spathulenol                            | 30.383 | 1587 | 1577 | 0.25         | ADAMS | 0.166         | 0.048 |
| valencene                              | 31.096 | 1591 | 1496 | 1.56         | ADAMS | 0.553         | 0.006 |
| $\alpha$ -copaene                      | 31.51  | 1627 | 1374 | 0.15         | ADAMS | 0.066         | 0.042 |
| $\alpha$ -selinene                     | 31.572 | 1627 | 1498 | 0.15         | ADAMS | 0.075         | 0.044 |
| aromadendrene epoxide                  | 31.811 | 1628 | 1639 | 5.98         | ADAMS | 1.216         | 0.054 |
| cis-cadina-1,4-diene                   | 31.989 | 1628 | 1495 | 1.06         | ADAMS | 0.530         | 0.038 |
| 10-epi- $\gamma$ -eudesmol             | 32.184 | 1631 | 1638 | 0.46         | ADAMS | 0.457         | 0.023 |
| $\alpha$ -muurolol                     | 32.541 | 1632 | 1640 | 1.24         | ADAMS | 4.270         | 0.025 |
| pogostol                               | 33.104 | 1638 | 1651 | 0.47         | ADAMS | 1.419         | 0.083 |
| selin-11-en-4- $\alpha$ -ol            | 33.484 | 1640 | 1652 | 0.22         | ADAMS | 0.364         | 0.018 |
| $\alpha$ -himachal-4-en-1- $\beta$ -ol | 33.645 | 1642 | 1699 | 2.17         | ADAMS | 1.506         | 0.014 |
| eudesm-7(11)-en-4-ol                   | 34.537 | 1696 | 1700 | 0.46         | ADAMS | 0.354         | 0.003 |
| benzyl benzoate                        | 37.023 | 1765 | 1759 | 0.61         | ADAMS | 0.774         | 0.016 |
| <b>Overall</b>                         |        |      |      | <b>97.62</b> |       | <b>97.835</b> |       |
| <b>Inflorescence Stage 1</b>           |        |      |      |              |       |               |       |
| camphene                               | 11.224 | 937  | 946  | 12.72        | ADAMS | 25.410        | 0.206 |
| limonene                               | 11.508 | 1038 | 1024 | 41.81        | ADAMS | 8.394         | 0.323 |
| 1,8-cineole                            | 11.605 | 1033 | 1026 | 5.45         | ADAMS | 8.222         | 0.291 |
| Z- $\beta$ -ocimene                    | 12.744 | 1034 | 1032 | 10.90        | ADAMS | 3.293         | 0.172 |
| E-caryophyllene                        | 27.047 | 1415 | 1417 | 5.45         | ADAMS | 5.363         | 0.072 |
| eupatoriochromene                      | 36.632 | 1639 | 1761 | 23.63        | ADAMS | 8.546         | 0.115 |
| <b>Overall</b>                         |        |      |      | <b>99.96</b> |       | <b>59.229</b> |       |
| <b>Inflorescence Stage 2</b>           |        |      |      |              |       |               |       |
| $\alpha$ -pinene                       | 6.725  | 936  | 932  | 15.68        | ADAMS | 18.220        | 0.081 |
| limonene                               | 8.235  | 1038 | 1024 | 21.56        | ADAMS | 9.175         | 0.067 |
| linalool                               | 10.727 | 1088 | 1008 | 35.29        | ADAMS | 29.239        | 0.029 |
| E-caryophyllene                        | 23.79  | 1415 | 1417 | 2.94         | ADAMS | 4.417         | 0.016 |
| E-nerolidol                            | 29.569 | 1546 | 1556 | 2.94         | ADAMS | 2.278         | 0.020 |
| eupatoriochromene                      | 33.636 | 1639 | 1761 | 21.56        | ADAMS | 6.345         | 0.012 |

|                              |        |      |      |              |       |               |       |
|------------------------------|--------|------|------|--------------|-------|---------------|-------|
| <b>Overall</b>               |        |      |      | <b>99.97</b> |       | <b>69.673</b> |       |
| <b>Inflorescence Stage 3</b> |        |      |      |              |       |               |       |
| limonene                     | 8.307  | 1039 | 1024 | 12.05        | ADAMS | 14.578        | 0.849 |
| Z- $\beta$ -ocimene          | 8.424  | 1035 | 1032 | 0.85         | ADAMS | 0.732         | 0.139 |
| E- $\beta$ -ocimene          | 8.79   | 1037 | 1044 | 2.20         | ADAMS | 2.243         | 0.105 |
| $\gamma$ -terpinene          | 9.217  | 1037 | 1054 | 0.07         | ADAMS | 0.113         | 0.027 |
| terpinolene                  | 10.181 | 1084 | 1086 | 0.28         | ADAMS | 0.325         | 0.002 |
| linalool                     | 11.085 | 1088 | 1008 | 47.08        | ADAMS | 62.023        | 2.755 |
| allo-ocimene                 | 11.875 | 1096 | 1128 | 0.07         | ADAMS | 0.206         | 0.120 |
| camphor                      | 12.587 | 1142 | 1141 | 0.24         | NIST  | 0.969         | 0.014 |
| E-caryophyllene              | 23.834 | 1416 | 1417 | 3.62         | ADAMS | 2.123         | 1.511 |
| $\beta$ -selinene            | 25.276 | 1464 | 1489 | 2.66         | ADAMS | 2.391         | 0.265 |
| E-nerolidol                  | 29.598 | 1546 | 1556 | 3.24         | ADAMS | 2.041         | 0.487 |
| eupatoriochromene            | 33.759 | 1639 | 1761 | 11.95        | ADAMS | 5.911         | 0.027 |
| <b>Overall</b>               |        |      |      | <b>84.30</b> |       | <b>93.655</b> |       |
| <b>Inflorescence Stage 4</b> |        |      |      |              |       |               |       |
| limonene                     | 8.297  | 1039 | 1024 | 6.82         | ADAMS | 6.299         | 0.028 |
| Z- $\beta$ -ocimene          | 8.43   | 1035 | 1032 | 1.50         | ADAMS | 0.814         | 0.003 |
| E- $\beta$ -ocimene          | 8.821  | 1037 | 1044 | 3.78         | ADAMS | 3.205         | 0.014 |
| cis-linalool oxide           | 9.66   | 1047 | 1067 | 0.74         | ADAMS | 0.150         | 0.002 |
| terpinolene                  | 10.18  | 1084 | 1086 | 0.10         | ADAMS | 0.192         | 0.002 |
| linalool                     | 11.222 | 1088 | 1008 | 54.10        | ADAMS | 73.136        | 0.061 |
| allo-ocimene                 | 11.917 | 1096 | 1128 | 0.15         | ADAMS | 0.041         | 0.000 |
| $\gamma$ -terpinene          | 13.989 | 1149 | 1054 | 0.08         | ADAMS | 0.058         | 0.002 |
| $\alpha$ -terpineol          | 14.595 | 1150 | 1186 | 0.89         | ADAMS | 0.022         | 0.006 |
| $\alpha$ -copaene            | 22.033 | 1365 | 1374 | 0.08         | ADAMS | 0.050         | 0.000 |
| $\beta$ -elemene             | 22.632 | 1376 | 1389 | 0.13         | ADAMS | 0.084         | 0.002 |
| E-caryophyllene              | 23.864 | 1416 | 1417 | 3.96         | ADAMS | 2.480         | 0.003 |
| germacrene D                 | 24.246 | 1426 | 1480 | 0.08         | ADAMS | 0.033         | 0.000 |
| $\beta$ -selinene            | 25.3   | 1464 | 1489 | 2.94         | ADAMS | 1.718         | 0.000 |
| $\alpha$ -selinene           | 26.888 | 1508 | 1498 | 0.30         | ADAMS | 0.136         | 0.004 |
| $\alpha$ -muurolene          | 27.036 | 1510 | 1500 | 0.10         | ADAMS | 0.059         | 0.006 |

|                          |        |      |      |              |       |               |       |
|--------------------------|--------|------|------|--------------|-------|---------------|-------|
| E,E- $\alpha$ -farnesene | 27.376 | 1513 | 1505 | 1.42         | ADAMS | 0.908         | 0.003 |
| $\delta$ -cadinene       | 27.815 | 1517 | 1522 | 0.23         | ADAMS | 0.112         | 0.001 |
| epizonarene              | 27.968 | 1518 | 1501 | 0.10         | ADAMS | 0.008         | 0.001 |
| elemol acetate           | 28.76  | 1515 | 1545 | 0.05         | ADAMS | 0.063         | 0.002 |
| E-nerolidol              | 29.63  | 1546 | 1556 | 3.80         | ADAMS | 2.249         | 0.005 |
| caryophyllene oxide      | 30.217 | 1593 | 1496 | 0.25         | ADAMS | 0.193         | 0.000 |
| valencene                | 31.1   | 1591 | 1496 | 0.20         | ADAMS | 0.124         | 0.001 |
| $\alpha$ -selinene       | 31.586 | 1626 | 1498 | 0.10         | ADAMS | 0.192         | 0.001 |
| aromadendrene epoxide    | 31.769 | 1628 | 1639 | 1.19         | ADAMS | 1.057         | 0.002 |
| eupatoriochromene        | 33.813 | 1639 | 1761 | 12.30        | ADAMS | 4.837         | 0.009 |
| benzyl benzoate          | 37.035 | 1765 | 1759 | 0.23         | ADAMS | 0.081         | 0.000 |
| <b>Overall</b>           |        |      |      | <b>96.15</b> |       | <b>98.649</b> |       |

| <i>Piper mollicomum</i> - October/2020 |        |      |        |       |            |         |       |
|----------------------------------------|--------|------|--------|-------|------------|---------|-------|
| Compounds                              | tR     | IRKc | IRKlit | % IN1 | IM         | Average | SD.   |
| Folha                                  |        |      |        |       |            |         |       |
| 3E-Hexenol                             | 3.801  | 845  | 844    | 0.33  | ADAMS      | 0.609   | 0.008 |
| $\alpha$ -pinene                       | 5.394  | 932  | 932    | 1.70  | ADAMS      | 1.804   | 0.001 |
| camphene                               | 5.82   | 934  | 946    | 3.48  | ADAMS      | 3.841   | 0.001 |
| $\beta$ -pinene                        | 6.563  | 941  | 974    | 2.13  | ADAMS      | 2.370   | 0.002 |
| myrcene                                | 6.845  | 943  | 988    | 0.56  | ADAMS      | 0.626   | 0.001 |
| limonene                               | 8.149  | 1032 | 1024   | 4.79  | ADAMS      | 5.405   | 0.005 |
| E- $\beta$ -ocimene                    | 8.706  | 1037 | 1044   | 0.27  | ADAMS      | 0.281   | 0.002 |
| cis-linalool oxide                     | 9.584  | 1047 | 1067   | 0.19  | ADAMS      | 0.222   | 0.001 |
| linalool                               | 10.821 | 1087 | 1088   | 22.33 | ADAMS      | 27.205  | 0.073 |
| $\alpha$ -fenchocamphorone             | 10.921 | 1088 | 1104   | 0.16  | ADAMS      | 0.082   | 0.001 |
| camphor                                | 12.544 | 1142 | 1141   | 4.45  | NIST       | 4.498   | 0.009 |
| borneol                                | 13.52  | 1147 | 1165   | 0.56  | NIST/ADAMS | 0.550   | 0.003 |
| $\alpha$ -terpineol                    | 14.525 | 1150 | 1186   | 0.29  | ADAMS      | 0.309   | 0.002 |
| bornyl acetate                         | 18.208 | 1286 | 1284   | 0.28  | ADAMS      | 0.093   | 0.000 |

|                          |        |      |      |      |       |       |       |
|--------------------------|--------|------|------|------|-------|-------|-------|
| undecanone               | 18.663 | 1290 | 1293 | 0.41 | ADAMS | 0.032 | 0.000 |
| δ-elemene                | 20.345 | 1347 | 1014 | 0.28 | ADAMS | 0.397 | 0.001 |
| α-copaene                | 22.013 | 1365 | 1374 | 0.23 | ADAMS | 0.200 | 0.000 |
| β-elemene                | 22.614 | 1376 | 1389 | 3.80 | ADAMS | 1.688 | 0.006 |
| α-gurjunene              | 23.292 | 1410 | 1409 | 0.25 | ADAMS | 0.247 | 0.001 |
| E-caryophyllene          | 23.814 | 1415 | 1417 | 4.40 | ADAMS | 3.542 | 0.002 |
| γ-elemene                | 24.247 | 1418 | 1434 | 1.45 | ADAMS | 4.875 | 0.008 |
| β-selinene               | 25.262 | 1455 | 1452 | 3.26 | ADAMS | 2.329 | 0.004 |
| aromadendrene            | 25.422 | 1457 | 1439 | 0.60 | ADAMS | 0.111 | 0.000 |
| δ-selinene               | 25.982 | 1462 | 1492 | 0.32 | ADAMS | 0.258 | 0.001 |
| α-amorphene              | 26.088 | 1462 | 1483 | 0.30 | ADAMS | 0.333 | 0.000 |
| germacrene D             | 26.335 | 1463 | 1480 | 6.25 | ADAMS | 2.884 | 0.001 |
| cis-4,10-epoxy-amorphane | 26.596 | 1464 | 1481 | 0.75 | ADAMS | 0.588 | 0.003 |
| α-cubebene               | 26.712 | 1491 | 1348 | 0.30 | ADAMS | 0.123 | 0.000 |
| bicyclogermacrene        | 26.892 | 1492 | 1500 | 3.96 | ADAMS | 3.274 | 0.021 |
| α-muurolene              | 27.034 | 1494 | 1500 | 0.60 | ADAMS | 0.482 | 0.000 |
| E,E-α-farnesene          | 27.376 | 1507 | 1505 | 3.64 | ADAMS | 2.272 | 0.143 |
| δ-cadinene               | 27.818 | 1511 | 1522 | 1.40 | ADAMS | 2.814 | 0.008 |
| epizonarene              | 27.967 | 1512 | 1501 | 0.29 | ADAMS | 0.387 | 0.001 |
| E-nerolidol              | 29.599 | 1546 | 1556 | 5.10 | ADAMS | 1.270 | 0.003 |
| guaiol                   | 30.045 | 1592 | 1600 | 0.31 | ADAMS | 0.243 | 0.001 |
| caryophyllene oxide      | 30.208 | 1594 | 1496 | 0.37 | ADAMS | 0.070 | 0.001 |
| spathulenol              | 30.391 | 1587 | 1577 | 0.61 | ADAMS | 0.089 | 0.001 |
| valencene                | 31.095 | 1591 | 1496 | 1.60 | ADAMS | 0.313 | 0.021 |
| α-copaene                | 31.507 | 1627 | 1374 | 0.31 | ADAMS | 0.163 | 0.003 |
| aromadendrene epoxide    | 31.785 | 1628 | 1639 | 4.85 | ADAMS | 4.536 | 0.009 |
| cis-cadina-1,4-diene     | 31.981 | 1628 | 1495 | 0.68 | ADAMS | 0.363 | 0.004 |
| 10-epi-γ-eudesmol        | 32.196 | 1631 | 1638 | 0.18 | ADAMS | 0.062 | 0.000 |
| α-muurolol               | 32.536 | 1632 | 1640 | 1.83 | ADAMS | 1.293 | 0.001 |
| Z-bisaboladien-4-ol      | 33.636 | 1644 | 1618 | 2.25 | ADAMS | 3.737 | 0.167 |
| benzyl benzoate          | 37.023 | 1765 | 1759 | 1.34 | ADAMS | 0.587 | 0.001 |

|                          |        |      |      |              |            |               |       |
|--------------------------|--------|------|------|--------------|------------|---------------|-------|
| sclareolide              | 48.189 | 2050 | 2065 | 0.26         | ADAMS      | 0.240         | 0.005 |
| <b>Overall</b>           |        |      |      | <b>97.08</b> |            | <b>88.809</b> |       |
| Inflorescence stage 1    |        |      |      |              |            |               |       |
| limonene                 | 8.262  | 1038 | 1024 | 13.99        | ADAMS      | 17.851        | 0.265 |
| linalool                 | 10.854 | 1087 | 1088 | 35.32        | ADAMS      | 44.290        | 0.080 |
| camphor                  | 12.555 | 1142 | 1141 | 1.73         | NIST       | 2.008         | 0.008 |
| borneol                  | 13.556 | 1147 | 1165 | 0.60         | NIST/ADAMS | 0.685         | 0.000 |
| $\alpha$ -terpineol      | 14.546 | 1150 | 1186 | 1.30         | ADAMS      | 1.486         | 0.004 |
| E-caryophyllene          | 23.793 | 1415 | 1417 | 1.99         | ADAMS      | 2.675         | 0.028 |
| $\alpha$ -humulene       | 25.243 | 1455 | 1452 | 1.47         | ADAMS      | 0.225         | 0.003 |
| E,E- $\alpha$ -farnesene | 27.354 | 1507 | 1505 | 0.69         | ADAMS      | 0.132         | 0.002 |
| E-nerolidol              | 29.599 | 1546 | 1556 | 2.33         | ADAMS      | 2.901         | 0.079 |
| eupatoriochromene        | 33.724 | 1639 | 1761 | 26.25        | ADAMS      | 16.126        | 0.114 |
| <b>Overall</b>           |        |      |      | <b>85.66</b> |            | <b>88.380</b> |       |
| Inflorescence stage 2    |        |      |      |              |            |               |       |
| limonene                 | 8.137  | 1038 | 1024 | 21.44        | ADAMS      | 20.074        | 4.169 |
| linalool                 | 10.695 | 1088 | 1008 | 36.53        | ADAMS      | 46.208        | 8.756 |
| E-caryophyllene          | 23.785 | 1415 | 1417 | 3.54         | ADAMS      | 2.756         | 0.211 |
| $\alpha$ -humulene       | 25.239 | 1455 | 1452 | 2.42         | ADAMS      | 2.423         | 0.421 |
| eupatoriochromene        | 33.636 | 1639 | 1761 | 20.13        | ADAMS      | 14.988        | 2.529 |
| <b>Overall</b>           |        |      |      | <b>84.06</b> |            | <b>86.450</b> |       |
| Inflorescence stage 3    |        |      |      |              |            |               |       |
| $\alpha$ -pinene         | 5.694  | 936  | 932  | 4.29         | ADAMS      | 4.29          |       |
| camphene                 | 6.062  | 934  | 946  | 7.17         | ADAMS      | 7.17          |       |
| $\beta$ -pinene          | 6.73   | 943  | 974  | 3.16         | ADAMS      | 3.16          |       |
| myrcene                  | 6.974  | 945  | 988  | 1.13         | ADAMS      | 1.13          |       |
| limonene                 | 8.273  | 1039 | 1024 | 7.44         | ADAMS      | 7.44          |       |
| 1,8-cineole              | 8.336  | 1033 | 1026 | 0.16         | ADAMS      | 0.16          |       |
| Z- $\beta$ -ocimene      | 8.416  | 1035 | 1032 | 0.74         | ADAMS      | 0.74          |       |
| E- $\beta$ -ocimene      | 8.784  | 1037 | 1044 | 2.10         | ADAMS      | 2.10          |       |

|                           |        |      |      |               |                |               |  |
|---------------------------|--------|------|------|---------------|----------------|---------------|--|
| cis-linalool oxide        | 9.648  | 1047 | 1067 | 0.39          | ADAMS          | 0.39          |  |
| terpinolene               | 10.179 | 1084 | 1086 | 0.16          | ADAMS          | 0.16          |  |
| linalool                  | 10.963 | 1088 | 1008 | 30.27         | ADAMS          | 30.27         |  |
| camphor                   | 12.672 | 1142 | 1141 | 11.45         | NIST           | 11.45         |  |
| camphene hydrate          | 12.898 | 1144 | 1145 | 0.16          | ADAMS          | 0.16          |  |
| borneol                   | 13.615 | 1147 | 1165 | 3.39          | NIST/ADA<br>MS | 3.39          |  |
| trans- $\beta$ -terpineol | 13.957 | 1149 | 1159 | 0.12          | ADAMS          | 0.12          |  |
| $\alpha$ -terpineol       | 14.556 | 1150 | 1186 | 0.86          | ADAMS          | 0.86          |  |
| bornyl acetate            | 18.229 | 1286 | 1284 | 0.39          | ADAMS          | 0.39          |  |
| $\beta$ -elemene          | 22.623 | 1376 | 1389 | 0.16          | ADAMS          | 0.16          |  |
| E-caryophyllene           | 23.825 | 1416 | 1417 | 3.47          | ADAMS          | 3.47          |  |
| $\alpha$ -humulene        | 25.268 | 1455 | 1452 | 2.49          | ADAMS          | 2.49          |  |
| aromadendrene             | 25.435 | 1457 | 1439 | 0.16          | ADAMS          | 0.16          |  |
| germacrene D              | 26.29  | 1426 | 1480 | 0.47          | ADAMS          | 0.47          |  |
| $\beta$ -selinene         | 26.596 | 1464 | 1489 | 0.16          | ADAMS          | 0.16          |  |
| $\alpha$ -selinene        | 26.881 | 1508 | 1498 | 0.35          | ADAMS          | 0.35          |  |
| $\alpha$ -muurolene       | 27.031 | 1510 | 1500 | 0.19          | ADAMS          | 0.19          |  |
| E,E- $\alpha$ -farnesene  | 27.352 | 1513 | 1505 | 0.78          | ADAMS          | 0.78          |  |
| $\delta$ -cadinene        | 27.807 | 1517 | 1522 | 0.35          | ADAMS          | 0.35          |  |
| E-nerolidol               | 29.587 | 1546 | 1556 | 2.92          | ADAMS          | 2.92          |  |
| caryophyllene oxide       | 30.208 | 1593 | 1496 | 0.19          | ADAMS          | 0.19          |  |
| cis- $\beta$ -guaiene     | 31.088 | 1620 | 1492 | 0.31          | ADAMS          | 0.31          |  |
| Z- $\alpha$ -bisabolene   | 31.271 | 1622 | 1506 | 0.27          | ADAMS          | 0.27          |  |
| aromadendrene epoxide     | 31.749 | 1628 | 1639 | 0.86          | ADAMS          | 0.86          |  |
| cis-cadina-1,4-diene      | 31.981 | 1628 | 1495 | 0.27          | ADAMS          | 0.27          |  |
| $\alpha$ -muurolol        | 32.528 | 1632 | 1640 | 0.31          | ADAMS          | 0.31          |  |
| $\alpha$ -copaene         | 32.698 | 1633 | 1640 | 0.23          | ADAMS          | 0.23          |  |
| eupatoriochromene         | 33.754 | 1639 | 1761 | 13.21         | ADAMS          | 13.21         |  |
| <b>Overall</b>            |        |      |      | <b>101.17</b> |                | <b>101.17</b> |  |
| Inflorescence stage 4     |        |      |      |               |                |               |  |

|                   |        |      |      |              |       |               |       |
|-------------------|--------|------|------|--------------|-------|---------------|-------|
| camphene          | 5.808  | 934  | 946  | 7.40         | ADAMS | 6.377         | 0.006 |
| limonene          | 8.135  | 1039 | 1024 | 5.71         | ADAMS | 3.118         | 0.003 |
| linalool          | 10.685 | 1088 | 1008 | 54.55        | ADAMS | 51.961        | 0.024 |
| camphor           | 12.506 | 1142 | 1141 | 12.47        | NIST  | 11.265        | 0.007 |
| borneol           | 13.522 | 1147 | 1165 | 6.10         | NIST  | 4.917         | 0.003 |
| E-caryophyllene   | 23.786 | 1416 | 1417 | 2.08         | ADAMS | 3.371         | 0.029 |
| eupatoriochromene | 33.646 | 1639 | 1761 | 9.87         | ADAMS | 5.632         | 1.254 |
| <b>Overall</b>    |        |      |      | <b>98.18</b> |       | <b>86.641</b> |       |

| <i>Piper mollicomum</i> - november/2020 |        |      |        |       |       |         |       |
|-----------------------------------------|--------|------|--------|-------|-------|---------|-------|
| Compounds                               | tR     | IRKc | IRKlit | % IN1 | IM    | Average | SD.   |
| Folha                                   |        |      |        |       |       |         |       |
| $\alpha$ -pinene                        | 6.654  | 928  | 932    | 11.33 | ADAMS | 1.362   | 0.009 |
| $\beta$ -pinene                         | 7.937  | 941  | 974    | 9.97  | ADAMS | 5.027   | 0.044 |
| 1,8-cineole                             | 9.941  | 1037 | 1026   | 14.75 | ADAMS | 2.701   | 0.020 |
| $\gamma$ -terpinene                     | 10.622 | 1045 | 1054   | 0.70  | ADAMS | 0.115   | 0.013 |
| Z- $\beta$ -ocimene                     | 11.58  | 1033 | 1032   | 0.17  | ADAMS | 0.113   | 0.005 |
| terpinolene                             | 11.636 | 1071 | 1086   | 0.29  | ADAMS | 0.115   | 0.001 |
| linalool                                | 12.149 | 1087 | 1088   | 0.76  | ADAMS | 0.338   | 0.053 |
| ocimene                                 | 13.267 | 1119 | 1128   | 0.31  | ADAMS | 0.328   | 0.017 |
| $\alpha$ -terpineol                     | 16.264 | 1286 | 1284   | 2.81  | ADAMS | 11.418  | 0.035 |
| undecanol                               | 20.632 | 1309 | 1301   | 0.25  | ADAMS | 0.143   | 0.008 |
| linalool propanoate                     | 21.479 | 1322 | 1334   | 2.22  | ADAMS | 9.198   | 0.008 |
| $\delta$ -elemene                       | 22.054 | 1346 | 1335   | 0.58  | ADAMS | 1.857   | 0.003 |
| $\beta$ -elemene                        | 24.063 | 1376 | 1389   | 5.28  | ADAMS | 4.453   | 0.035 |
| $\alpha$ -gurjunene                     | 25.076 | 1410 | 1409   | 0.11  | ADAMS | 0.561   | 0.002 |
| $\beta$ -gurjunene                      | 25.796 | 1415 | 1433   | 5.73  | ADAMS | 5.624   | 0.013 |
| E-caryophyllene                         | 25.842 | 1415 | 1417   | 0.55  | ADAMS | 0.833   | 0.021 |
| $\gamma$ -elemene                       | 26.201 | 1418 | 1434   | 4.04  | ADAMS | 15.950  | 0.064 |
| aromadendrene                           | 26.463 | 1457 | 1439   | 0.13  | ADAMS | 0.465   | 0.013 |



|                             |        |      |      |              |       |               |       |
|-----------------------------|--------|------|------|--------------|-------|---------------|-------|
| cis-cadina-1(6),4-diene     | 26.696 | 1455 | 1461 | 1.15         | ADAMS | 4.392         | 0.007 |
| cis-muurolo-4(14),5-diene   | 27     | 1457 | 1465 | 1.57         | ADAMS | 1.025         | 0.005 |
| linalool isovalerate        | 27.235 | 1461 | 1466 | 2.61         | ADAMS | 2.527         | 0.004 |
| trans-muurolo-4(14),5-diene | 27.945 | 1492 | 1493 | 1.07         | ADAMS | 1.539         | 0.014 |
| germacrene D                | 28.248 | 1495 | 1480 | 2.93         | ADAMS | 4.434         | 0.023 |
| $\beta$ -selinene           | 28.483 | 1498 | 1452 | 0.80         | ADAMS | 0.887         | 0.008 |
| $\gamma$ -cadinene          | 28.581 | 1511 | 1513 | 0.75         | ADAMS | 0.717         | 0.004 |
| germacrene B                | 28.804 | 1516 | 1559 | 1.63         | ADAMS | 1.143         | 0.012 |
| E,E- $\alpha$ -farnesene    | 29.098 | 1524 | 1505 | 1.55         | ADAMS | 1.364         | 0.013 |
| $\delta$ -cadinene          | 29.675 | 1529 | 1522 | 1.53         | ADAMS | 1.295         | 0.014 |
| E-nerolidol                 | 31.328 | 1546 | 1561 | 2.09         | ADAMS | 2.096         | 0.016 |
| $\alpha$ -cadinol           | 34.921 | 1793 | 1652 | 0.82         | ADAMS | 0.982         | 0.002 |
| intermedeol                 | 35.007 | 1794 | 1658 | 0.49         | ADAMS | 0.146         | 0.002 |
| eupatoriochromene           | 35.477 | 1798 | 1761 | 1.87         | ADAMS | 2.567         | 0.015 |
| caryophyllene acetate       | 36.769 | 1817 | 1701 | 1.21         | ADAMS | 0.313         | 0.003 |
| benzyl benzoate             | 38.805 | 1765 | 1759 | 0.70         | ADAMS | 0.272         | 0.004 |
| aromadendrene epoxide       | 31.785 | 1628 | 1639 | 4.85         | ADAMS | 1.645         | 0.008 |
| cis-cadina-1,4-diene        | 31.981 | 1628 | 1495 | 0.68         | ADAMS | 0.156         | 0.003 |
| $\alpha$ -muurolol          | 32.536 | 1632 | 1640 | 1.83         | ADAMS | 0.852         | 0.026 |
| $\alpha$ -copaene           | 32.704 | 1633 | 1640 | 0.52         | ADAMS | 0.018         | 0.002 |
| Z-bisaboladien-4-ol         | 33.636 | 1644 | 1618 | 2.25         | ADAMS | 0.043         | 0.001 |
| benzyl benzoate             | 37.023 | 1765 | 1759 | 1.34         | ADAMS | 0.177         | 0.014 |
| sclareolide                 | 48.189 | 2050 | 2065 | 0.26         | ADAMS | 0.026         | 0.004 |
| <b>Overall</b>              |        |      |      | <b>96.38</b> |       | <b>89.254</b> |       |
| Inflorescence stage 1       |        |      |      |              |       |               |       |
| $\alpha$ -pinene            | 8.93   | 937  | 932  | 1.97         | ADAMS | 10.545        | 1.016 |
| $\beta$ -pinene             | 9.502  | 941  | 974  | 4.56         | ADAMS | 17.129        | 0.356 |
| myrcene                     | 9.561  | 943  | 988  | 1.49         | ADAMS | 1.672         | 0.013 |
| $\alpha$ -phellandrene      | 9.963  | 979  | 1002 | 0.14         | ADAMS | 0.424         | 0.055 |
| $\alpha$ -terpinene         | 10.205 | 1000 | 1014 | 0.42         | ADAMS | 1.154         | 0.116 |
| 1,8-cineole                 | 10.81  | 996  | 1026 | 17.54        | ADAMS | 26.078        | 8.836 |

|                        |        |      |      |              |       |               |         |
|------------------------|--------|------|------|--------------|-------|---------------|---------|
| 2,3-diethyl-pyrazine   | 13.397 | 1088 | 1081 | 0.18         | ADAMS | 0.065         | 0.015   |
| $\alpha$ -terpineol    | 15.17  | 1150 | 1162 | 7.68         | ADAMS | 2.308         | 0.143   |
| E-nerolidol            | 31.147 | 1546 | 1561 | 1.02         | ADAMS | 0.200         | 0.025   |
| germacrene D-4-ol      | 33.85  | 1567 | 1574 | 0.17         | ADAMS | 0.088         | 0.009   |
| eupatoriochromene      | 35.784 | 1798 | 1761 | 33.36        | ADAMS | 11.848        | 0.598   |
| caryophyllene acetate  | 36.769 | 1817 | 1701 | 1.18         | ADAMS | 2.066         | 0.473   |
| <b>Overall</b>         |        |      |      | <b>69.71</b> |       | <b>73.577</b> |         |
| Inflorescence stage 2  |        |      |      |              |       |               |         |
| $\alpha$ -pinene       | 8.869  | 937  | 932  | 3.02         | ADAMS | 9.347         | 1.326   |
| sabinene               | 9.3    | 954  | 969  | 1.12         | ADAMS | 3.072         | 0.290   |
| $\beta$ -pinene        | 9.546  | 942  | 932  | 6.99         | ADAMS | 8.151         | 0.377   |
| myrcene                | 9.623  | 943  | 988  | 1.46         | ADAMS | 1.245         | 0.067   |
| $\alpha$ -phellandrene | 9.948  | 979  | 1002 | 0.15         | ADAMS | 0.217         | 0.024   |
| $\alpha$ -terpinene    | 10.185 | 1000 | 1014 | 0.61         | ADAMS | 0.698         | 0.030   |
| 1,8-cineole            | 10.878 | 1035 | 1026 | 22.83        | ADAMS | 44.917        | 0.942   |
| linalool               | 12.758 | 1088 | 1098 | 4.67         | ADAMS | 4.146         | 0.177   |
| trans-sabinene hydrate | 12.821 | 1090 | 1098 | 0.17         | ADAMS | 0.118         | 0.005   |
| ocimene                | 13.469 | 1120 | 1128 | 0.66         | ADAMS | 0.206         | 0.005   |
| camphor                | 14.295 | 1142 | 1141 | 0.10         | ADAMS | 0.018         | 0.000   |
| $\alpha$ -terpineol    | 15.31  | 1177 | 1186 | 11.63        | ADAMS | 3.392         | 0.347   |
| pinocamphone           | 15.726 | 1245 | 1247 | 1.40         | ADAMS | 0.011         | 0.001   |
| $\alpha$ -copaene      | 23.748 | 1365 | 1374 | 0.10         | ADAMS | 0.690         | 0.051   |
| $\beta$ -elemene       | 24.322 | 1376 | 1389 | 0.28         | ADAMS | 0.090         | 0.001   |
| E-caryophyllene        | 25.664 | 1415 | 1417 | 1.66         | ADAMS | 0.049         | 0.013   |
| germacrene D           | 25.972 | 1495 | 1480 | 0.32         | ADAMS | 0.086         | 0.004   |
| $\gamma$ -himachalene  | 26.864 | 1479 | 1481 | 0.14         | ADAMS | 0.073         | 0.002   |
| $\alpha$ -humulene     | 27.109 | 1480 | 1452 | 1.26         | ADAMS | 0.013         | 0.002   |
| $\beta$ -selinene      | 28.362 | 1498 | 1452 | 0.14         | ADAMS | 0.023         | #DIV/0! |
| $\alpha$ -selinene     | 28.654 | 1500 | 1498 | 0.17         | ADAMS | 0.012         | 0.000   |
| $\delta$ -cadinene     | 29.547 | 1529 | 1522 | 0.31         | ADAMS | 0.012         | 0.001   |
| E-nerolidol            | 31.243 | 1546 | 1561 | 0.96         | ADAMS | 0.041         | 0.003   |

|                           |        |      |      |              |       |               |       |
|---------------------------|--------|------|------|--------------|-------|---------------|-------|
| caryophyllene oxide       | 32.003 | 1594 | 1582 | 0.11         | ADAMS | 0.113         | 0.006 |
| epi- $\alpha$ -cadinol    | 34.273 | 1789 | 1638 | 0.26         | ADAMS | 0.189         | 0.017 |
| eupatoriochromene         | 36.149 | 1653 | 1761 | 23.74        | ADAMS | 8.408         | 0.594 |
| cis-thujopsenal           | 36.927 | 1707 | 1708 | 0.74         | ADAMS | 0.120         | 0.152 |
| benzyl benzoate           | 38.793 | 1765 | 1759 | 0.20         | ADAMS | 0.033         | 0.001 |
| <b>Overall</b>            |        |      |      | <b>85.20</b> |       | <b>85.479</b> |       |
| Inflorescence stage 3     |        |      |      |              |       |               |       |
| $\alpha$ -pinene          | 8.827  | 936  | 932  | 2.87         | ADAMS | 2.768         | 2.215 |
| $\beta$ -pinene           | 9.555  | 943  | 974  | 5.24         | ADAMS | 6.802         | 0.119 |
| myrcene                   | 9.629  | 945  | 988  | 1.38         | ADAMS | 1.269         | 0.044 |
| $\alpha$ -phellandrene    | 9.939  | 979  | 1002 | 0.11         | ADAMS | 0.206         | 0.066 |
| $\alpha$ -terpinene       | 10.178 | 1000 | 1014 | 0.48         | ADAMS | 0.289         | 0.009 |
| 1,8-cineole               | 10.961 | 1033 | 1026 | 22.01        | ADAMS | 51.276        | 0.320 |
| $\gamma$ -terpinene       | 11.404 | 1045 | 1054 | 1.43         | ADAMS | 0.625         | 0.019 |
| tolualdehyde              | 11.869 | 1054 | 1062 | 0.42         | ADAMS | 0.016         | 0.001 |
| terpinolene               | 12.271 | 1071 | 1086 | 0.47         | ADAMS | 0.789         | 0.039 |
| linalool                  | 12.938 | 1088 | 1008 | 4.37         | ADAMS | 2.480         | 0.054 |
| trans-sabinene hydrate    | 12.994 | 1090 | 1098 | 0.18         | ADAMS | 0.026         | 0.000 |
| ocimene                   | 13.592 | 1120 | 1128 | 0.90         | ADAMS | 0.063         | 0.002 |
| $\alpha$ -terpineol       | 15.064 | 1150 | 1162 | 1.94         | ADAMS | 0.750         | 0.012 |
| terpinen-4-ol             | 15.876 | 1189 | 1174 | 0.90         | ADAMS | 0.518         | 0.007 |
| bornyl acetate            | 16.357 | 1286 | 1284 | 9.43         | ADAMS | 5.612         | 0.096 |
| $\delta$ -elemene         | 22.058 | 1346 | 1335 | 0.21         | ADAMS | 0.012         | 0.001 |
| $\alpha$ -copaene         | 23.777 | 1365 | 1374 | 0.21         | ADAMS | 0.086         | 0.059 |
| $\beta$ -elemene          | 24.413 | 1376 | 1389 | 0.75         | ADAMS | 0.034         | 0.007 |
| E-caryophyllene           | 25.734 | 1416 | 1417 | 2.91         | ADAMS | 1.439         | 0.052 |
| germacrene D              | 26.054 | 1426 | 1480 | 1.22         | ADAMS | 0.262         | 0.011 |
| trans-cadina-1(6),4-diene | 26.609 | 1465 | 1475 | 0.22         | ADAMS | 0.086         | 0.010 |
| 9-epi-E-caryophyllene     | 27.248 | 1460 | 1464 | 2.16         | ADAMS | 1.334         | 0.026 |
| $\gamma$ -curcumene       | 27.945 | 1480 | 1481 | 0.15         | ADAMS | 0.130         | 0.013 |
| $\beta$ -selinene         | 28.43  | 1498 | 1452 | 0.25         | ADAMS | 0.074         | 0.002 |

|                          |        |      |      |              |       |               |       |
|--------------------------|--------|------|------|--------------|-------|---------------|-------|
| $\gamma$ -cadinene       | 28.537 | 1511 | 1513 | 0.15         | ADAMS | 0.266         | 0.003 |
| $\alpha$ -selinene       | 28.723 | 1500 | 1498 | 0.38         | ADAMS | 0.111         | 0.004 |
| E,E- $\alpha$ -farnesene | 29.051 | 1524 | 1505 | 0.63         | ADAMS | 0.207         | 0.003 |
| $\delta$ -cadinene       | 29.61  | 1529 | 1522 | 0.30         | ADAMS | 0.226         | 0.002 |
| E-nerolidol              | 31.308 | 1546 | 1561 | 1.16         | ADAMS | 0.259         | 0.015 |
| caryophyllene oxide      | 32.049 | 1593 | 1496 | 0.19         | ADAMS | 0.035         | 0.005 |
| 2E,4E-dodecadial         | 33.933 | 1780 | 1518 | 0.30         | ADAMS | 0.070         | 0.001 |
| epi- $\alpha$ -cadinol   | 34.308 | 1789 | 1638 | 0.26         | ADAMS | 0.122         | 0.002 |
| eupatoriochromene        | 36.372 | 1639 | 1761 | 24.25        | ADAMS | 9.009         | 0.179 |
| cis-thujopsenal          | 37.096 | 1707 | 1708 | 0.87         | ADAMS | 1.008         | 0.238 |
| benzyl benzoate          | 38.842 | 1765 | 1759 | 0.15         | ADAMS | 0.037         | 0.008 |
| <b>Overall</b>           |        |      |      | <b>88.85</b> |       | <b>88.297</b> |       |
| Inflorescence stage 4    |        |      |      |              |       |               |       |
| $\alpha$ -pinene         | 8.503  | 936  | 932  | 2.40         | ADAMS | 6.803         | 1.370 |
| $\beta$ -pinene          | 9.566  | 943  | 974  | 9.87         | ADAMS | 5.397         | 0.040 |
| 1,8-cineole              | 10.793 | 1036 | 1026 | 16.19        | ADAMS | 58.780        | 1.379 |
| linalool                 | 13.549 | 1091 | 1098 | 8.01         | ADAMS | 4.066         | 0.152 |
| ocimene                  | 14.152 | 1119 | 1128 | 1.53         | ADAMS | 0.281         | 0.006 |
| $\alpha$ -terpineol      | 14.642 | 1150 | 1162 | 0.49         | ADAMS | 0.013         | 0.001 |
| camphor                  | 14.828 | 1152 | 1141 | 0.30         | ADAMS | 0.018         | 0.001 |
| $\delta$ -terpineol      | 15.624 | 1160 | 1162 | 1.68         | ADAMS | 0.311         | 0.031 |
| bornyl acetate           | 16.425 | 1286 | 1284 | 3.46         | ADAMS | 0.611         | 0.013 |
| $\alpha$ -terpineol      | 17.588 | 1287 | 1186 | 11.33        | ADAMS | 6.059         | 0.220 |
| Geraniol                 | 17.917 | 1288 | 1249 | 0.24         | ADAMS | 0.008         | 0.003 |
| neryl acetate            | 23.858 | 1350 | 1359 | 0.40         | ADAMS | 0.029         | 0.001 |
| $\beta$ -elemene         | 24.403 | 1376 | 1389 | 0.24         | ADAMS | 0.085         | 0.114 |
| E-caryophyllene          | 25.861 | 1415 | 1417 | 3.88         | ADAMS | 0.606         | 0.143 |
| $\beta$ -gurjunene       | 26.103 | 1430 | 1431 | 0.36         | ADAMS | 0.031         | 0.001 |
| $\alpha$ -humulene       | 27.34  | 1551 | 1452 | 3.89         | ADAMS | 0.357         | 0.018 |
| $\gamma$ -curcumene      | 27.969 | 1480 | 1481 | 1.20         | ADAMS | 0.448         | 0.005 |
| germacrene D             | 28.134 | 1482 | 1480 | 0.28         | ADAMS | 0.045         | 0.011 |

|                          |        |      |      |              |       |               |       |
|--------------------------|--------|------|------|--------------|-------|---------------|-------|
| $\beta$ -selinene        | 28.46  | 1498 | 1489 | 0.32         | ADAMS | 0.029         | 0.010 |
| cis-cadina-1,4-diene     | 28.563 | 1499 | 1495 | 0.37         | ADAMS | 0.075         | 0.003 |
| $\alpha$ -selinene       | 28.751 | 1500 | 1498 | 0.48         | ADAMS | 0.094         | 0.005 |
| E,E- $\alpha$ -farnesene | 29.112 | 1524 | 1505 | 1.37         | ADAMS | 0.053         | 0.049 |
| $\gamma$ -cadinene       | 29.644 | 1525 | 1513 | 0.53         | ADAMS | 0.061         | 0.001 |
| E-nerolidol              | 31.423 | 1546 | 1561 | 1.63         | ADAMS | 0.206         | 0.018 |
| caryophyllene oxide      | 32.121 | 1593 | 1496 | 0.34         | ADAMS | 0.019         | 0.001 |
| zerumbone                | 33.186 | 1728 | 1732 | 0.34         | ADAMS | 0.039         | 0.001 |
| $\alpha$ -copaene        | 34.528 | 1757 | 1374 | 0.19         | ADAMS | 0.013         | 0.002 |
| eupatoriochromene        | 36.299 | 1801 | 1761 | 20.04        | ADAMS | 6.836         | 0.207 |
| caryophyllene acetate    | 36.769 | 1817 | 1701 | 1.02         | ADAMS | 0.350         | 0.038 |
| benzyl benzoate          | 39.01  | 1765 | 1759 | 0.17         | ADAMS | 0.046         | 0.002 |
| <b>Overall</b>           |        |      |      | <b>92.55</b> |       | <b>91.770</b> |       |

| <i>Piper mollicomum</i> - december/2020 |        |      |        |       |       |         |       |
|-----------------------------------------|--------|------|--------|-------|-------|---------|-------|
| Compounds                               | tR     | IRKc | IRKlit | % IN1 | IM    | Average | SD.   |
| Folha                                   |        |      |        |       |       |         |       |
| $\alpha$ -pinene                        | 6.607  | 928  | 932    | 16.07 | ADAMS | 11.307  | 0.021 |
| $\beta$ -pinene                         | 7.901  | 941  | 974    | 9.60  | ADAMS | 6.493   | 0.011 |
| 1,8-cineole                             | 9.755  | 1037 | 1026   | 25.80 | ADAMS | 8.363   | 0.009 |
| $\gamma$ -terpinene                     | 10.569 | 1045 | 1054   | 0.43  | ADAMS | 4.038   | 0.003 |
| linalool                                | 12.165 | 1087 | 1088   | 4.16  | ADAMS | 11.287  | 0.043 |
| ocimene                                 | 13.249 | 1119 | 1128   | 0.27  | ADAMS | 0.421   | 0.004 |
| $\alpha$ -terpineol                     | 15.04  | 1150 | 1162   | 3.41  | ADAMS | 3.012   | 0.002 |
| terpinen-4-ol                           | 15.479 | 1189 | 1174   | 0.58  | ADAMS | 0.664   | 0.006 |
| undecanone                              | 20.163 | 1307 | 1293   | 0.18  | ADAMS | 0.714   | 0.004 |
| undecanol                               | 20.607 | 1309 | 1301   | 0.24  | ADAMS | 0.907   | 0.006 |
| $\delta$ -elemene                       | 22.005 | 1346 | 1335   | 1.30  | ADAMS | 2.179   | 0.001 |
| $\alpha$ -cubebene                      | 23.468 | 1347 | 1348   | 0.27  | ADAMS | 0.248   | 0.001 |
| $\alpha$ -copaene                       | 23.731 | 1365 | 1374   | 0.23  | ADAMS | 0.428   | 0.002 |

|                       |        |      |      |              |       |               |       |
|-----------------------|--------|------|------|--------------|-------|---------------|-------|
| β-elemene             | 24.375 | 1376 | 1389 | 7.66         | ADAMS | 8.626         | 0.019 |
| germacrene D          | 28.073 | 1495 | 1480 | 4.08         | ADAMS | 1.411         | 0.004 |
| β-selinene            | 28.368 | 1498 | 1452 | 2.83         | ADAMS | 2.342         | 0.009 |
| E,E-α-farnesene       | 28.958 | 1524 | 1505 | 1.08         | ADAMS | 0.977         | 0.006 |
| δ-cadinene            | 29.558 | 1529 | 1522 | 1.28         | ADAMS | 1.944         | 0.001 |
| Elemol                | 30.697 | 1541 | 1548 | 0.39         | ADAMS | 0.326         | 0.001 |
| E-nerolidol           | 31.242 | 1546 | 1561 | 3.25         | ADAMS | 1.760         | 0.004 |
| caryophyllene oxide   | 32.017 | 1594 | 1582 | 0.62         | ADAMS | 0.114         | 0.023 |
| gleenol               | 32.183 | 1595 | 1586 | 0.20         | ADAMS | 0.036         | 0.001 |
| elemenone             | 32.507 | 1596 | 1589 | 0.23         | ADAMS | 0.670         | 0.006 |
| pogostol              | 32.889 | 1645 | 1651 | 0.32         | ADAMS | 0.007         | 0.000 |
| zerumbone             | 33.075 | 1728 | 1732 | 0.51         | ADAMS | 0.054         | 0.005 |
| caryophyllene acetate | 36.658 | 1804 | 1417 | 0.82         | ADAMS | 0.094         | 0.002 |
| benzyl benzoate       | 38.734 | 1765 | 1759 | 0.39         | ADAMS | 0.106         | 0.015 |
| <b>Overall</b>        |        |      |      | <b>86.20</b> |       | <b>68.527</b> |       |
| Inflorescence stage 1 |        |      |      |              |       |               |       |
| α-pinene              | 8.834  | 937  | 932  | 1.19         | ADAMS | 8.582         | 0.300 |
| sabinene              | 9.271  | 954  | 969  | 0.37         | ADAMS | 0.437         | 0.007 |
| β-pinene              | 9.499  | 941  | 974  | 3.53         | ADAMS | 6.388         | 0.130 |
| myrcene               | 9.568  | 943  | 988  | 0.97         | ADAMS | 1.153         | 0.131 |
| α-phellandrene        | 9.918  | 979  | 1002 | 0.17         | ADAMS | 0.740         | 0.051 |
| α-terpinene           | 10.158 | 1000 | 1014 | 1.29         | ADAMS | 0.474         | 0.082 |
| 1,8-cineole           | 10.838 | 996  | 1026 | 12.47        | ADAMS | 32.619        | 0.236 |
| linalool              | 12.667 | 1087 | 1095 | 4.00         | ADAMS | 6.112         | 0.173 |
| ocimene               | 13.404 | 1119 | 1128 | 0.42         | ADAMS | 0.308         | 0.012 |
| δ-terpineol           | 15.257 | 1157 | 1162 | 1.90         | ADAMS | 1.753         | 0.042 |
| terpinen-4-ol         | 15.45  | 1189 | 1174 | 1.13         | ADAMS | 0.502         | 0.012 |
| α-terpineol           | 15.964 | 1150 | 1162 | 9.44         | ADAMS | 3.956         | 0.097 |
| α-copaene             | 23.747 | 1375 | 1374 | 0.18         | ADAMS | 0.072         | 0.004 |
| β-elemene             | 24.335 | 1376 | 1389 | 0.50         | ADAMS | 1.200         | 0.035 |
| E-caryophyllene       | 25.795 | 1415 | 1417 | 4.24         | ADAMS | 1.441         | 0.013 |

|                          |        |      |      |              |       |               |       |
|--------------------------|--------|------|------|--------------|-------|---------------|-------|
| E,E- $\alpha$ -farnesene | 26.894 | 1524 | 1505 | 1.36         | ADAMS | 0.173         | 0.002 |
| $\beta$ -gurjunene       | 27.821 | 1525 | 1431 | 0.34         | ADAMS | 0.187         | 0.005 |
| $\gamma$ -curcumene      | 27.897 | 1528 | 1515 | 0.20         | ADAMS | 0.215         | 0.018 |
| germacrene D             | 28.06  | 1529 | 1480 | 0.35         | ADAMS | 0.112         | 0.004 |
| $\beta$ -selinene        | 28.395 | 1531 | 1452 | 0.46         | ADAMS | 0.243         | 0.011 |
| $\alpha$ -cubebene       | 28.511 | 1535 | 1348 | 0.21         | ADAMS | 0.140         | 0.001 |
| $\alpha$ -selinene       | 28.691 | 1537 | 1498 | 0.52         | ADAMS | 0.083         | 0.003 |
| $\alpha$ -muurolene      | 28.776 | 1538 | 1500 | 0.17         | ADAMS | 0.209         | 0.002 |
| $\beta$ -bisabolene      | 29.132 | 1540 | 1505 | 0.17         | ADAMS | 0.138         | 0.005 |
| $\alpha$ -cedrene        | 29.197 | 1541 | 1410 | 0.25         | ADAMS | 0.260         | 0.002 |
| $\alpha$ -amorphene      | 29.346 | 1543 | 1483 | 0.15         | ADAMS | 0.033         | 0.002 |
| $\delta$ -cadinene       | 29.582 | 1544 | 1522 | 0.91         | ADAMS | 0.099         | 0.001 |
| isolekene                | 29.725 | 1545 | 1374 | 0.17         | ADAMS | 0.263         | 0.002 |
| E-nerolidol              | 31.358 | 1566 | 1561 | 3.41         | ADAMS | 0.768         | 0.013 |
| cis-cadina-1,4-diene     | 33.785 | 1780 | 1495 | 0.26         | ADAMS | 0.123         | 0.004 |
| eupatoriochromene        | 36.771 | 1798 | 1761 | 28.06        | ADAMS | 15.264        | 0.318 |
| caryophyllene acetate    | 37.098 | 1804 | 1417 | 1.78         | ADAMS | 0.427         | 0.008 |
| benzyl benzoate          | 38.831 | 1808 | 1759 | 0.19         | ADAMS | 1.997         | 0.249 |
| <b>Overall</b>           |        |      |      | <b>80.76</b> |       | <b>86.468</b> |       |
| Inflorescence stage 2    |        |      |      |              |       |               |       |
| $\alpha$ -pinene         | 8.742  | 937  | 932  | 0.97         | ADAMS | 7.037         | 0.976 |
| sabinene                 | 9.199  | 954  | 969  | 0.47         | ADAMS | 0.386         | 0.117 |
| $\beta$ -pinene          | 9.45   | 942  | 932  | 3.22         | ADAMS | 6.177         | 0.908 |
| myrcene                  | 9.52   | 943  | 988  | 0.73         | ADAMS | 1.653         | 0.654 |
| $\alpha$ -phellandrene   | 9.864  | 979  | 1002 | 0.16         | ADAMS | 0.253         | 0.033 |
| $\alpha$ -terpinene      | 10.108 | 1000 | 1014 | 0.41         | ADAMS | 2.395         | 1.675 |
| 1,8-cineole              | 10.785 | 1035 | 1026 | 10.52        | ADAMS | 33.015        | 0.481 |
| $\gamma$ -terpinene      | 11.361 | 1045 | 1054 | 0.59         | ADAMS | 3.572         | 0.587 |
| toluolaldehyde           | 11.669 | 1054 | 1062 | 0.65         | ADAMS | 1.034         | 0.375 |
| ocimene                  | 13.511 | 1120 | 1128 | 0.55         | ADAMS | 1.706         | 0.938 |
| $\alpha$ -terpineol      | 15.353 | 1177 | 1186 | 9.60         | ADAMS | 4.842         | 0.740 |

|                             |        |      |      |              |       |               |       |
|-----------------------------|--------|------|------|--------------|-------|---------------|-------|
| terpinen-4-ol               | 15.762 | 1189 | 1174 | 0.91         | ADAMS | 0.024         | 0.001 |
| linalool propanoate         | 22.078 | 1322 | 1334 | 1.22         | ADAMS | 0.127         | 0.017 |
| $\alpha$ -copaene           | 23.784 | 1365 | 1374 | 0.51         | ADAMS | 0.106         | 0.026 |
| $\beta$ -elemene            | 24.52  | 1376 | 1389 | 3.46         | ADAMS | 0.351         | 0.022 |
| E-caryophyllene             | 24.909 | 1415 | 1417 | 6.30         | ADAMS | 2.492         | 0.232 |
| germacrene D                | 26.173 | 1495 | 1480 | 7.43         | ADAMS | 1.420         | 0.344 |
| $\alpha$ -amorphene         | 26.993 | 1497 | 1483 | 1.53         | ADAMS | 0.798         | 0.117 |
| $\alpha$ -humulene          | 27.287 | 1498 | 1452 | 2.76         | ADAMS | 0.852         | 0.476 |
| $\delta$ -selinene          | 27.807 | 1500 | 1492 | 0.39         | ADAMS | 0.318         | 0.007 |
| $\gamma$ -curcumene         | 28.028 | 1528 | 1515 | 0.69         | ADAMS | 0.468         | 0.025 |
| $\beta$ -selinene           | 28.501 | 1529 | 1452 | 0.77         | ADAMS | 0.746         | 0.033 |
| tridecanone                 | 28.643 | 1531 | 1495 | 0.29         | ADAMS | 0.428         | 0.001 |
| $\alpha$ -selinene          | 28.797 | 1500 | 1498 | 1.10         | ADAMS | 0.327         | 0.027 |
| $\alpha$ -muurolene         | 28.886 | 1538 | 1500 | 0.71         | ADAMS | 0.491         | 0.008 |
| E,E- $\alpha$ -farnesene    | 29.138 | 1524 | 1505 | 1.68         | ADAMS | 0.151         | 0.018 |
| $\delta$ -cadinene          | 29.436 | 1529 | 1522 | 2.06         | ADAMS | 0.828         | 0.007 |
| E-iso- $\gamma$ -bisabolene | 30.403 | 1535 | 1528 | 0.15         | ADAMS | 0.113         | 0.002 |
| Elemol                      | 30.748 | 1541 | 1548 | 0.40         | ADAMS | 0.125         | 0.001 |
| E-nerolidol                 | 31.586 | 1546 | 1561 | 5.56         | ADAMS | 1.461         | 0.121 |
| caryophyllene oxide         | 32.141 | 1594 | 1582 | 0.61         | ADAMS | 0.119         | 0.018 |
| $\alpha$ -copaene           | 34.567 | 1640 | 1374 | 0.77         | ADAMS | 0.009         | 0.001 |
| $\alpha$ -humulene          | 34.852 | 1643 | 1452 | 0.89         | ADAMS | 0.130         | 0.003 |
| Viridiflorol                | 35.042 | 1651 | 1592 | 2.15         | ADAMS | 0.229         | 0.008 |
| eupatoriochromene           | 36.126 | 1653 | 1761 | 14.16        | ADAMS | 6.547         | 0.497 |
| caryophyllene acetate       | 37.007 | 1661 | 1417 | 1.38         | ADAMS | 0.258         | 0.040 |
| benzyl benzoate             | 38.878 | 1765 | 1759 | 0.58         | ADAMS | 0.085         | 0.015 |
| <b>Overall</b>              |        |      |      | <b>86.33</b> |       | <b>81.073</b> |       |
| Inflorescence stage 3       |        |      |      |              |       |               |       |
| $\alpha$ -pinene            | 8.865  | 936  | 932  | 1.05         | ADAMS | 3.503         | 0.089 |
| $\beta$ -pinene             | 9.488  | 953  | 974  | 2.96         | ADAMS | 8.131         | 0.012 |
| myrcene                     | 9.553  | 966  | 988  | 0.96         | ADAMS | 0.919         | 0.062 |



|                             |        |      |      |              |       |               |       |
|-----------------------------|--------|------|------|--------------|-------|---------------|-------|
| $\alpha$ -phellandrene      | 9.927  | 988  | 1002 | 0.13         | ADAMS | 0.121         | 0.013 |
| $\alpha$ -terpinene         | 10.169 | 996  | 1014 | 0.26         | ADAMS | 0.127         | 0.007 |
| 1,8-cineole                 | 10.684 | 1025 | 1026 | 6.83         | ADAMS | 22.927        | 0.931 |
| $\gamma$ -terpinene         | 11.281 | 1051 | 1054 | 2.08         | ADAMS | 5.550         | 0.478 |
| tolualdehyde                | 11.601 | 1056 | 1062 | 0.75         | ADAMS | 0.554         | 0.055 |
| terpinolene                 | 12.066 | 1080 | 1086 | 0.42         | ADAMS | 0.061         | 0.030 |
| linalool                    | 12.587 | 1083 | 1008 | 3.37         | ADAMS | 8.461         | 0.192 |
| ocimene                     | 13.367 | 1127 | 1128 | 1.03         | ADAMS | 4.352         | 0.056 |
| $\alpha$ -terpineol         | 15.827 | 1163 | 1162 | 1.86         | ADAMS | 1.656         | 0.034 |
| E,E- $\alpha$ -farnesene    | 29.021 | 1521 | 1505 | 1.60         | ADAMS | 0.113         | 0.016 |
| E-iso- $\gamma$ -bisabolene | 29.138 | 1533 | 1528 | 0.67         | ADAMS | 0.281         | 0.019 |
| $\alpha$ -cedrene           | 29.202 | 1541 | 1410 | 0.31         | ADAMS | 0.196         | 0.108 |
| $\alpha$ -amorphene         | 29.357 | 1545 | 1483 | 0.21         | ADAMS | 0.261         | 0.048 |
| $\delta$ -cadinene          | 29.597 | 1546 | 1522 | 1.38         | ADAMS | 3.310         | 0.320 |
| E-nerolidol                 | 31.506 | 1556 | 1561 | 7.39         | ADAMS | 2.659         | 0.759 |
| caryophyllene oxide         | 32.08  | 1595 | 1496 | 0.40         | ADAMS | 0.444         | 0.015 |
| $\gamma$ -gurjunene         | 32.292 | 1598 | 1431 | 0.57         | ADAMS | 0.225         | 0.047 |
| ledol                       | 32.963 | 1603 | 1602 | 0.77         | ADAMS | 0.516         | 0.001 |
| $\delta$ -selinene          | 33.418 | 1609 | 1492 | 0.64         | ADAMS | 0.080         | 0.010 |
| cis-cadina-1,4-diene        | 33.813 | 1610 | 1495 | 0.42         | ADAMS | 0.080         | 0.005 |
| 2E,4E-dodecadial            | 33.955 | 1628 | 1518 | 0.50         | ADAMS | 0.216         | 0.112 |
| $\alpha$ -ylangene          | 34.023 | 1630 | 1373 | 0.20         | ADAMS | 0.180         | 0.013 |
| $\alpha$ -humulene          | 34.79  | 1643 | 1452 | 2.01         | ADAMS | 2.496         | 0.478 |
| Viridiflorol                | 34.953 | 1656 | 1592 | 1.58         | ADAMS | 0.163         | 0.007 |
| eupatoriochromene           | 36.104 | 1657 | 1761 | 23.60        | ADAMS | 15.652        | 0.567 |
| caryophyllene acetate       | 36.687 | 1662 | 1417 | 0.46         | ADAMS | 0.375         | 0.137 |
| benzyl benzoate             | 38.822 | 1763 | 1759 | 0.32         | ADAMS | 0.207         | 0.203 |
| <b>Overall</b>              |        |      |      | <b>64.73</b> |       | <b>83.816</b> |       |
| Inflorescence stage 4       |        |      |      |              |       |               |       |
| $\alpha$ -pinene            | 6.635  | 939  | 932  | 14.79        | ADAMS | 14.703        | 0.147 |
| $\beta$ -pinene             | 7.921  | 943  | 974  | 9.94         | ADAMS | 3.190         | 0.051 |

|                           |        |      |      |              |       |               |       |
|---------------------------|--------|------|------|--------------|-------|---------------|-------|
| 1,8-cineole               | 9.868  | 1036 | 1026 | 34.60        | ADAMS | 23.076        | 0.008 |
| $\gamma$ -terpinene       | 10.599 | 1051 | 1054 | 0.82         | ADAMS | 0.034         | 0.002 |
| sabinene                  | 11.044 | 1060 | 969  | 0.16         | ADAMS | 0.217         | 0.001 |
| terpinolene               | 11.632 | 1069 | 1086 | 0.45         | ADAMS | 0.263         | 0.012 |
| linalool                  | 12.187 | 1075 | 1098 | 4.16         | ADAMS | 4.455         | 0.007 |
| ocimene                   | 13.26  | 1121 | 1128 | 1.02         | ADAMS | 0.769         | 0.002 |
| $\alpha$ -terpineol       | 15.063 | 1134 | 1162 | 7.44         | ADAMS | 5.026         | 0.005 |
| $\alpha$ -selinene        | 28.644 | 1505 | 1498 | 0.17         | ADAMS | 0.271         | 0.015 |
| E,E- $\alpha$ -farnesene  | 28.939 | 1524 | 1505 | 0.46         | ADAMS | 0.539         | 0.004 |
| E-nerolidol               | 31.166 | 1546 | 1561 | 0.97         | ADAMS | 0.133         | 0.008 |
| $\alpha$ -humulene        | 34.708 | 1643 | 1452 | 0.28         | ADAMS | 0.247         | 0.008 |
| Viridiflorol              | 34.882 | 1656 | 1592 | 0.20         | ADAMS | 1.230         | 0.251 |
| eupatoriochromene         | 35.681 | 1801 | 1761 | 15.95        | ADAMS | 32.923        | 0.037 |
| caryophyllene acetate     | 36.769 | 1817 | 1701 | 1.02         | ADAMS | 1.131         | 0.002 |
| <b>Overall</b>            |        |      |      | <b>92.43</b> |       | <b>88.208</b> |       |
| Inflorescence stage 5     |        |      |      |              |       |               |       |
| $\alpha$ -pinene          | 8.857  | 945  | 932  | 1.85         | ADAMS | 6.952         | 0.816 |
| sabinene                  | 9.281  | 957  | 969  | 0.33         | ADAMS | 0.253         | 0.022 |
| $\beta$ -pinene           | 9.459  | 946  | 974  | 3.01         | ADAMS | 5.515         | 0.111 |
| myrcene                   | 9.529  | 947  | 988  | 1.05         | ADAMS | 2.244         | 0.138 |
| $\alpha$ -phellandrene    | 9.929  | 979  | 1002 | 0.14         | ADAMS | 0.652         | 0.071 |
| $\alpha$ -terpinene       | 10.174 | 983  | 1014 | 0.37         | ADAMS | 0.691         | 0.008 |
| 1,8-cineole               | 10.82  | 1019 | 1026 | 11.29        | ADAMS | 26.282        | 0.185 |
| E- $\beta$ -ocimene       | 10.986 | 1039 | 1044 | 1.45         | ADAMS | 0.981         | 0.020 |
| $\gamma$ -terpinene       | 11.321 | 1055 | 1054 | 0.47         | ADAMS | 0.462         | 0.018 |
| terpinolene               | 12.137 | 1066 | 1086 | 0.46         | ADAMS | 0.142         | 0.006 |
| linalool                  | 12.934 | 1096 | 1098 | 10.99        | ADAMS | 10.466        | 0.328 |
| ocimene                   | 13.549 | 1123 | 1128 | 0.93         | ADAMS | 0.278         | 0.005 |
| trans- $\beta$ -terpineol | 15.046 | 1147 | 1159 | 0.59         | ADAMS | 0.186         | 0.003 |
| $\alpha$ -terpineol       | 16.042 | 1157 | 1162 | 4.25         | ADAMS | 2.116         | 0.053 |
| $\beta$ -elemene          | 24.325 | 1381 | 1389 | 0.39         | ADAMS | 0.148         | 0.004 |

|                             |        |      |      |              |       |               |       |
|-----------------------------|--------|------|------|--------------|-------|---------------|-------|
| E-caryophyllene             | 24.789 | 1415 | 1417 | 5.24         | ADAMS | 2.445         | 0.057 |
| germacrene D                | 25.975 | 1477 | 1480 | 0.65         | ADAMS | 1.185         | 0.028 |
| $\alpha$ -humulene          | 26.208 | 1453 | 1452 | 6.64         | ADAMS | 1.780         | 0.033 |
| $\alpha$ -amorphene         | 27.807 | 1462 | 1483 | 0.21         | ADAMS | 0.173         | 0.008 |
| $\gamma$ -curcumene         | 27.883 | 1519 | 1515 | 0.21         | ADAMS | 0.257         | 0.020 |
| $\beta$ -selinene           | 28.375 | 1557 | 1498 | 0.36         | ADAMS | 0.345         | 0.007 |
| $\alpha$ -selinene          | 28.669 | 1517 | 1522 | 0.78         | ADAMS | 0.040         | 0.002 |
| E,E- $\alpha$ -farnesene    | 28.954 | 1507 | 1505 | 0.39         | ADAMS | 0.061         | 0.001 |
| E-iso- $\gamma$ -bisabolene | 29.099 | 1535 | 1528 | 0.19         | ADAMS | 0.096         | 0.003 |
| $\delta$ -cadinene          | 29.552 | 1520 | 1522 | 0.32         | ADAMS | 0.448         | 0.042 |
| E-nerolidol                 | 30.3   | 1554 | 1561 | 6.52         | ADAMS | 2.489         | 0.010 |
| caryophyllene oxide         | 30.699 | 1585 | 1582 | 0.65         | ADAMS | 0.042         | 0.001 |
| $\gamma$ -gurjunene         | 32.925 | 1590 | 1409 | 0.27         | ADAMS | 0.064         | 0.003 |
| valencene                   | 33.516 | 1593 | 1496 | 0.11         | ADAMS | 0.367         | 0.037 |
| cis-cadina-1,4-diene        | 33.774 | 1597 | 1495 | 0.57         | ADAMS | 0.412         | 0.020 |
| eupatoriochromene           | 35.91  | 1697 | 1761 | 21.07        | ADAMS | 9.651         | 0.203 |
| caryophyllene acetate       | 36.861 | 1700 | 1701 | 1.82         | ADAMS | 0.581         | 0.007 |
| benzyl benzoate             | 38.766 | 1763 | 1759 | 0.29         | ADAMS | 1.028         | 0.102 |
| <b>Overall</b>              |        |      |      | <b>83.57</b> |       | <b>78.832</b> |       |

| <i>Piper mollicomum</i> - january/2021 |        |      |        |       |       |         |       |
|----------------------------------------|--------|------|--------|-------|-------|---------|-------|
| Compounds                              | tR     | IRKc | IRKlit | % IN1 | IM    | Average | SD.   |
| Folha                                  |        |      |        |       |       |         |       |
| $\alpha$ -pinene                       | 6.539  | 928  | 932    | 11.94 | ADAMS | 3.799   | 0.002 |
| $\beta$ -pinene                        | 7.913  | 941  | 974    | 11.08 | ADAMS | 1.940   | 0.002 |
| 1,8-cineole                            | 9.811  | 1037 | 1026   | 28.19 | ADAMS | 11.244  | 0.010 |
| $\gamma$ -terpinene                    | 10.587 | 1045 | 1054   | 0.60  | ADAMS | 0.036   | 0.001 |
| linalool oxide <cis->                  | 11.042 | 1053 | 1067   | 0.23  | ADAMS | 0.236   | 0.045 |
| terpinolene                            | 11.625 | 1071 | 1086   | 0.32  | ADAMS | 0.484   | 0.012 |
| linalool                               | 12.127 | 1087 | 1088   | 1.34  | ADAMS | 2.158   | 0.007 |

[illegible]

|                        |        |      |      |              |       |               |       |
|------------------------|--------|------|------|--------------|-------|---------------|-------|
| $\alpha$ -pinene       | 8.922  | 937  | 932  | 3.12         | ADAMS | 12.957        | 0.017 |
| $\beta$ -pinene        | 9.501  | 941  | 974  | 5.09         | ADAMS | 15.845        | 0.081 |
| myrcene                | 9.561  | 943  | 988  | 1.72         | ADAMS | 3.274         | 0.117 |
| $\alpha$ -phellandrene | 9.959  | 979  | 1002 | 0.13         | ADAMS | 0.129         | 0.007 |
| $\alpha$ -terpinene    | 10.201 | 1000 | 1014 | 0.55         | ADAMS | 1.373         | 0.005 |
| 1,8-cineole            | 10.809 | 996  | 1026 | 19.38        | ADAMS | 13.510        | 0.294 |
| $\gamma$ -terpinene    | 11.292 | 1045 | 1054 | 0.86         | ADAMS | 11.002        | 0.012 |
| terpinolene            | 12.078 | 1071 | 1086 | 0.56         | ADAMS | 10.541        | 0.143 |
| linalool               | 12.507 | 1087 | 1095 | 2.89         | ADAMS | 2.432         | 0.059 |
| trans-sabinene hydrate | 12.608 | 1089 | 1098 | 0.21         | ADAMS | 0.363         | 0.049 |
| ocimene                | 13.391 | 1119 | 1128 | 0.29         | ADAMS | 3.181         | 0.189 |
| $\delta$ -terpineol    | 15.174 | 1157 | 1162 | 1.38         | ADAMS | 0.166         | 0.027 |
| terpinen-4-ol          | 15.599 | 1189 | 1174 | 0.81         | ADAMS | 0.058         | 0.031 |
| $\alpha$ -terpineol    | 15.847 | 1150 | 1162 | 9.35         | ADAMS | 1.212         | 0.237 |
| $\beta$ -elemene       | 24.292 | 1376 | 1389 | 0.16         | ADAMS | 0.061         | 0.002 |
| E-caryophyllene        | 25.554 | 1415 | 1417 | 1.44         | ADAMS | 0.191         | 0.021 |
| $\alpha$ -humulene     | 26.841 | 1498 | 1452 | 1.11         | ADAMS | 0.161         | 0.006 |
| E-nerolidol            | 31.154 | 1566 | 1561 | 1.24         | ADAMS | 0.136         | 0.002 |
| eupatoriochromene      | 35.646 | 1798 | 1761 | 19.81        | ADAMS | 2.979         | 0.194 |
| <b>Overall</b>         |        |      |      | <b>70.10</b> |       | <b>79.570</b> |       |
| Inflorescence stage 2  |        |      |      |              |       |               |       |
| $\alpha$ -pinene       | 8.914  | 937  | 932  | 1.14         | ADAMS | 13.587        | 0.003 |
| $\beta$ -pinene        | 9.48   | 942  | 932  | 3.95         | ADAMS | 18.189        | 0.050 |
| myrcene                | 9.542  | 943  | 988  | 1.24         | ADAMS | 2.661         | 0.040 |
| $\alpha$ -terpinene    | 10.198 | 1000 | 1014 | 0.33         | ADAMS | 0.094         | 0.004 |
| 1,8-cineole            | 10.779 | 1035 | 1026 | 21.04        | ADAMS | 16.503        | 0.123 |
| linalool               | 12.585 | 1083 | 1008 | 7.82         | ADAMS | 10.342        | 0.026 |
| ocimene                | 13.389 | 1120 | 1128 | 0.23         | ADAMS | 0.076         | 0.001 |
| $\delta$ -terpineol    | 15.181 | 1137 | 1162 | 1.94         | ADAMS | 1.921         | 0.069 |
| $\alpha$ -terpineol    | 16.301 | 1177 | 1186 | 12.54        | ADAMS | 2.243         | 0.252 |
| E-nerolidol            | 31.174 | 1546 | 1561 | 1.99         | ADAMS | 0.124         | 0.001 |

|                          |        |      |      |              |       |               |       |
|--------------------------|--------|------|------|--------------|-------|---------------|-------|
| E,E- $\alpha$ -farnesene | 33.855 | 1521 | 1505 | 0.19         | ADAMS | 0.050         | 0.001 |
| $\alpha$ -humulene       | 34.687 | 1643 | 1452 | 0.50         | ADAMS | 0.033         | 0.009 |
| eupatoriochromene        | 35.411 | 1653 | 1761 | 4.19         | ADAMS | 0.127         | 0.003 |
| caryophyllene acetate    | 36.642 | 1661 | 1417 | 0.91         | ADAMS | 0.043         | 0.001 |
| benzyl benzoate          | 38.702 | 1765 | 1759 | 0.15         | ADAMS | 0.382         | 0.027 |
| <b>Overall</b>           |        |      |      | <b>58.16</b> |       | <b>66.374</b> |       |
| Inflorescence stage 3    |        |      |      |              |       |               |       |
| $\alpha$ -pinene         | 8.846  | 936  | 932  | 2.45         | ADAMS | 2.252         | 0.268 |
| sabinene                 | 9.289  | 950  | 969  | 0.60         | ADAMS | 1.072         | 0.020 |
| $\beta$ -pinene          | 9.561  | 953  | 974  | 5.76         | ADAMS | 2.421         | 0.474 |
| myrcene                  | 9.636  | 966  | 988  | 1.56         | ADAMS | 1.548         | 0.181 |
| $\alpha$ -phellandrene   | 9.948  | 988  | 1002 | 0.11         | ADAMS | 1.414         | 0.390 |
| $\alpha$ -terpinene      | 10.183 | 996  | 1014 | 0.59         | ADAMS | 1.539         | 0.383 |
| 1,8-cineole              | 10.986 | 1025 | 1026 | 23.98        | ADAMS | 33.752        | 0.268 |
| linalool                 | 12.908 | 1083 | 1008 | 5.10         | ADAMS | 21.600        | 1.435 |
| trans-sabinene hydrate   | 12.964 | 1089 | 1098 | 0.16         | ADAMS | 0.713         | 0.013 |
| ocimene                  | 13.265 | 1127 | 1128 | 1.04         | ADAMS | 0.105         | 0.004 |
| $\delta$ -terpineol      | 15.329 | 1137 | 1162 | 2.06         | ADAMS | 1.530         | 0.125 |
| bornyl acetate           | 15.429 | 1286 | 1284 | 0.82         | ADAMS | 0.015         | 0.001 |
| $\alpha$ -terpineol      | 15.895 | 1163 | 1162 | 9.82         | ADAMS | 3.316         | 0.206 |
| $\beta$ -elemene         | 24.349 | 1381 | 1389 | 0.32         | ADAMS | 0.079         | 0.009 |
| E-caryophyllene          | 24.997 | 1419 | 1417 | 3.08         | ADAMS | 0.126         | 0.009 |
| germacrene D             | 26     | 1496 | 1480 | 0.43         | ADAMS | 0.128         | 0.016 |
| $\alpha$ -humulene       | 27.199 | 1498 | 1452 | 2.07         | ADAMS | 1.141         | 0.091 |
| $\gamma$ -curcumene      | 27.91  | 1491 | 1515 | 0.17         | ADAMS | 0.127         | 0.016 |
| $\beta$ -selinene        | 28.397 | 1500 | 1489 | 0.20         | ADAMS | 0.143         | 0.055 |
| $\alpha$ -selinene       | 28.69  | 1502 | 1498 | 0.24         | ADAMS | 0.058         | 0.002 |
| E,E- $\alpha$ -farnesene | 29.345 | 1521 | 1505 | 0.29         | ADAMS | 0.060         | 0.002 |
| $\delta$ -cadinene       | 29.564 | 1546 | 1522 | 0.17         | ADAMS | 0.128         | 0.004 |
| E-nerolidol              | 31.314 | 1556 | 1561 | 1.52         | ADAMS | 0.034         | 0.007 |
| caryophyllene oxide      | 32.048 | 1595 | 1496 | 0.26         | ADAMS | 0.012         | 0.000 |

|                          |        |      |      |              |       |               |       |
|--------------------------|--------|------|------|--------------|-------|---------------|-------|
| zerumbone                | 33.105 | 1728 | 1732 | 0.30         | ADAMS | 0.035         | 0.004 |
| $\gamma$ -gurjunene      | 33.384 | 1598 | 1431 | 0.69         | ADAMS | 0.015         | 0.002 |
| eupatoriochromene        | 36.104 | 1657 | 1761 | 20.58        | ADAMS | 4.574         | 0.288 |
| $\alpha$ -humulene       | 34.779 | 1643 | 1452 | 1.88         | ADAMS | 0.243         | 0.015 |
| caryophyllene acetate    | 37.018 | 1662 | 1417 | 1.41         | ADAMS | 0.496         | 0.053 |
| <b>Overall</b>           |        |      |      | <b>87.66</b> |       | <b>78.675</b> |       |
| Inflorescence stage 4    |        |      |      |              |       |               |       |
| $\beta$ -pinene          | 7.877  | 943  | 974  | 3.73         | ADAMS | 2.492         | 0.464 |
| 1,8-cineole              | 9.779  | 1036 | 1026 | 18.11        | ADAMS | 49.322        | 1.380 |
| ocimene                  | 10.097 | 1121 | 1128 | 2.19         | ADAMS | 1.366         | 0.389 |
| $\gamma$ -terpinene      | 10.554 | 1051 | 1054 | 0.22         | ADAMS | 0.029         | 0.005 |
| terpinolene              | 11.597 | 1080 | 1086 | 0.21         | ADAMS | 2.718         | 0.866 |
| linalool                 | 12.363 | 1083 | 1008 | 9.21         | ADAMS | 7.541         | 0.720 |
| ocimene                  | 13.252 | 1127 | 1128 | 0.61         | ADAMS | 0.352         | 0.033 |
| bornyl acetate           | 15.474 | 1286 | 1284 | 0.51         | ADAMS | 0.431         | 0.049 |
| $\alpha$ -terpineol      | 16.237 | 1134 | 1162 | 4.71         | ADAMS | 3.538         | 0.542 |
| E-caryophyllene          | 25.566 | 1415 | 1417 | 1.24         | ADAMS | 0.813         | 0.077 |
| $\alpha$ -humulene       | 27.027 | 1487 | 1452 | 1.14         | ADAMS | 0.331         | 0.033 |
| $\beta$ -selinene        | 28.342 | 1500 | 1489 | 0.40         | ADAMS | 0.143         | 0.034 |
| $\alpha$ -selinene       | 28.633 | 1505 | 1498 | 0.17         | ADAMS | 0.143         | 0.031 |
| E,E- $\alpha$ -farnesene | 28.919 | 1524 | 1505 | 0.16         | ADAMS | 0.265         | 0.055 |
| $\delta$ -cadinene       | 29.517 | 1546 | 1522 | 0.15         | ADAMS | 0.262         | 0.047 |
| E-nerolidol              | 31.273 | 1546 | 1561 | 4.23         | ADAMS | 1.703         | 0.174 |
| caryophyllene oxide      | 32.001 | 1595 | 1496 | 0.16         | ADAMS | 0.016         | 0.002 |
| $\delta$ -cadinene       | 34.255 | 1546 | 1522 | 0.13         | ADAMS | 0.048         | 0.006 |
| $\alpha$ -copaene        | 34.432 | 1798 | 1374 | 0.14         | ADAMS | 0.016         | 0.004 |
| $\alpha$ -muurolol       | 34.763 | 1800 | 1640 | 0.16         | ADAMS | 0.062         | 0.011 |
| Viridiflorol             | 34.865 | 1656 | 1592 | 0.32         | ADAMS | 0.154         | 0.021 |
| eupatoriochromene        | 35.518 | 1801 | 1761 | 7.78         | ADAMS | 3.710         | 0.367 |
| caryophyllene acetate    | 36.646 | 1817 | 1701 | 0.48         | ADAMS | 0.202         | 0.058 |
| <b>Overall</b>           |        |      |      | <b>56.16</b> |       | <b>75.656</b> |       |

| Inflorescence stage 5     |        |      |      |              |       |               |       |
|---------------------------|--------|------|------|--------------|-------|---------------|-------|
| $\alpha$ -pinene          | 8.758  | 935  | 932  | 1.66         | ADAMS | 4.705         | 2.173 |
| $\beta$ -pinene           | 9.518  | 949  | 974  | 4.97         | ADAMS | 6.011         | 1.368 |
| $\alpha$ -terpinene       | 10.142 | 998  | 1014 | 0.16         | ADAMS | 0.217         | 0.017 |
| 1,8-cineole               | 10.961 | 1022 | 1026 | 17.37        | ADAMS | 47.722        | 3.531 |
| E- $\beta$ -ocimene       | 11.571 | 1040 | 1044 | 0.97         | ADAMS | 0.887         | 0.046 |
| $\gamma$ -terpinene       | 11.745 | 1057 | 1054 | 0.52         | ADAMS | 0.026         | 0.005 |
| terpinolene               | 12.359 | 1071 | 1086 | 0.37         | ADAMS | 0.109         | 0.140 |
| linalool                  | 13.403 | 1091 | 1098 | 13.03        | ADAMS | 6.776         | 1.667 |
| ocimene                   | 13.977 | 1129 | 1128 | 1.25         | ADAMS | 0.196         | 0.015 |
| camphor                   | 14.61  | 1149 | 1141 | 0.15         | NIST  | 0.157         | 0.077 |
| trans- $\beta$ -terpineol | 15.392 | 1155 | 1159 | 1.00         | ADAMS | 0.385         | 0.047 |
| $\alpha$ -terpineol       | 17.002 | 1168 | 1162 | 8.18         | ADAMS | 4.168         | 0.603 |
| E-caryophyllene           | 25.134 | 1415 | 1417 | 1.41         | ADAMS | 0.704         | 0.056 |
| $\alpha$ -humulene        | 25.79  | 1441 | 1452 | 5.29         | ADAMS | 1.190         | 0.122 |
| E-nerolidol               | 30.618 | 1561 | 1561 | 5.98         | ADAMS | 0.280         | 0.061 |
| $\alpha$ -selinene        | 33.567 | 1601 | 1498 | 0.45         | ADAMS | 0.201         | 0.056 |
| cis-cadina-1,4-diene      | 33.946 | 1653 | 1495 | 0.32         | ADAMS | 0.788         | 0.030 |
| eupatoriochromene         | 36.109 | 1757 | 1761 | 11.38        | ADAMS | 2.369         | 0.486 |
| caryophyllene acetate     | 37.122 | 1761 | 1701 | 2.50         | ADAMS | 0.243         | 0.065 |
| benzyl benzoate           | 38.88  | 1766 | 1759 | 0.37         |       | 0.159         | 0.063 |
| <b>Overall</b>            |        |      |      | <b>76.96</b> |       | <b>77.291</b> |       |

tR = Calculated retention index (column HP-5MS); IRLit = Literature retention index (Adams. 2009); SD - standard deviation; IM - identification methodology ;All substances were identified by EM and DIC according to the experimental.



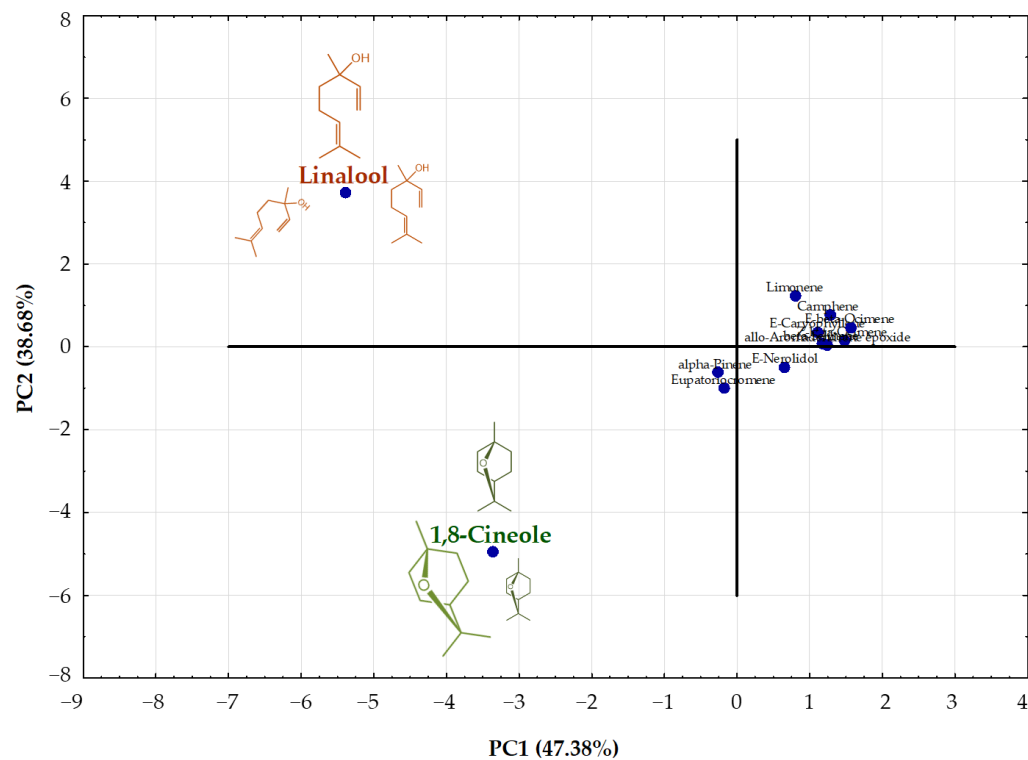

**Figure S1.** Ordering diagram produced by the principal component analysis (PCA) demonstrating the projections of the constituents present in the EOs from leaves and inflorescences of *Piper mollicomum* Kunth in the months under study (September 2020 to January 2021).

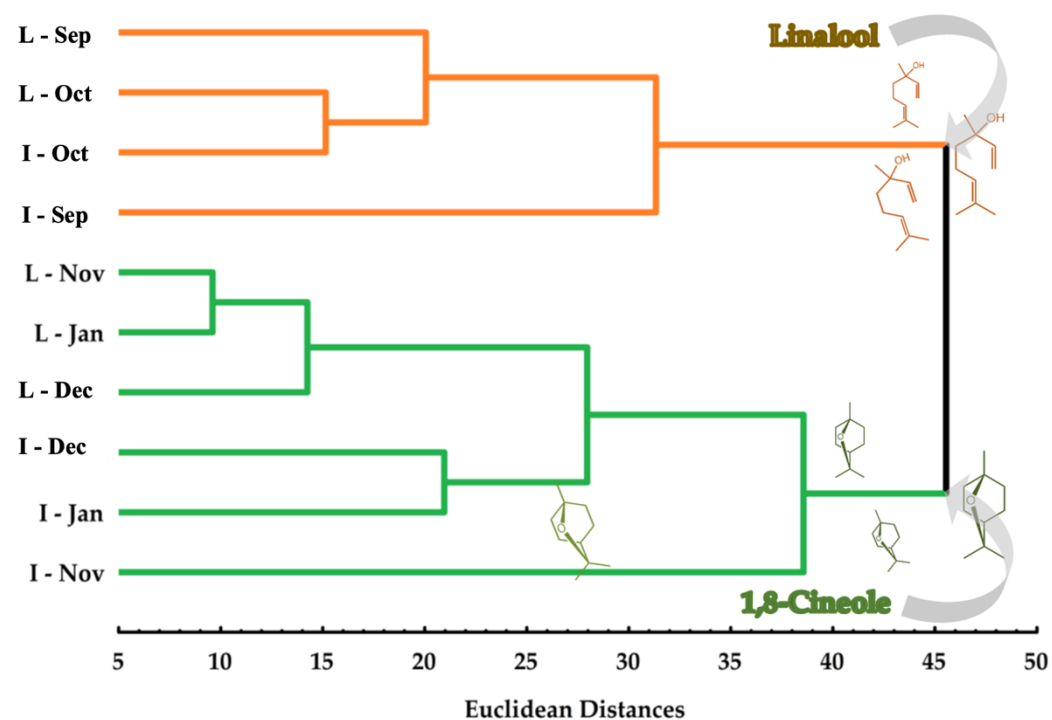

**Figure S2.** Euclidean Hierarchical Grouping that shows the projections of the constituents present in the EOs from leaves and inflorescences of *Piper mollicomum* Kunth in the months under study (September 2020 to January 2021). Sep – September; Oct – October; Nov – November; Dec – December; Jan – Jan. L – Leaves; I – Inflorescences.

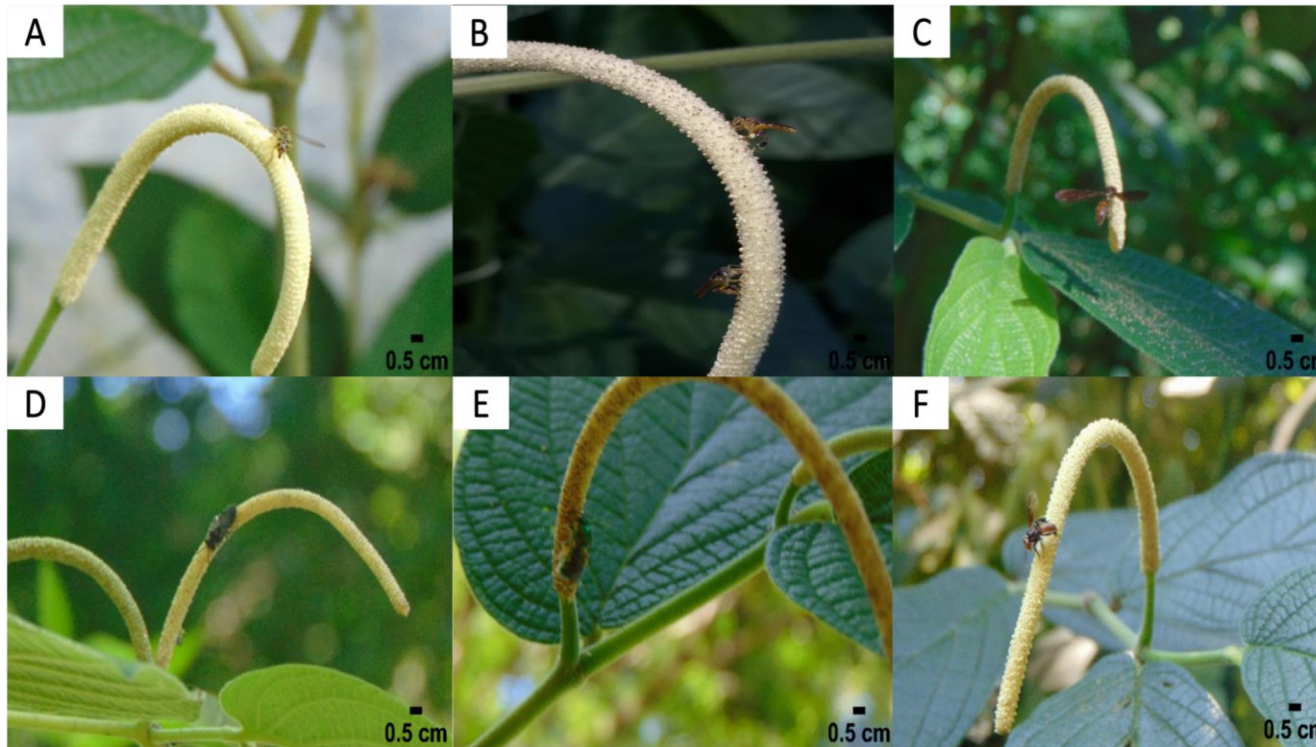

**Figure S3.** Main visitors of inflorescences of *Piper mollicomum* Kunth from Floresta da Tijuca / RJ. Observations were made weekly from September 2020 to January 2021. A) - Insect 1 (Diptera - *Syrphidae* sp. 1); (B) - Insect 2 (Hymenoptera - *Tetragonisca angustula* Latreille, 1811); (C) - Insect 3 (Diptera - *Syrphidae* sp. 2); (D) - Insect 4 (Hymenoptera - *Halictidae* sp. 1); (E) - Insect 5 (Hymenoptera - *Halictidae* sp. 2); (F) – Insect 6 (Hymenoptera - *Colletidae* sp.).
